# Supplementary material for: Fe(ii) complexes of 2,2′:6′,2′′-terpyridine ligands functionalized with substituted-phenyl groups: synthesis, crystal structures and anticancer potential
Source: Royal Society of Chemistry journal article supplement (doi:10.1039/d3dt02732e), 2023-01-01
Supplement: d3dt02732e1.pdf [file d3dt02732e1.pdf]

## Electronic Supporting Information

# Fe(II) complexes of 2,2':6',2''-terpyridine ligands functionalized with substituted-phenyl groups: Synthesis, crystal structures and anticancer potential

Dameng Sun,<sup>a</sup> Xin Huang,<sup>a</sup> Ruojun Man,<sup>b</sup> Xinjie Jia,<sup>a</sup> Xinluan Song,<sup>a</sup> Sihan Wang,<sup>a</sup> Xingyong Xue,<sup>\*b</sup>  
Hongming Liu,<sup>\*a</sup> and Zhen Ma<sup>\*a</sup>

<sup>a</sup> School of Chemistry and Chemical Engineering, Guangxi University, 530004 Nanning, Guangxi, People's Republic of China. E-mail: hongming9224@126.com(H. Liu), mzmz2009@sohu.com(Z. Ma).

<sup>b</sup> School of Chemistry and Chemical Engineering, Guangxi Minzu University, 530006 Nanning, Guangxi, People's Republic of China. E-mail: 315254042@qq.com(X. Xue).

## Index

|                                                                                                                      |    |
|----------------------------------------------------------------------------------------------------------------------|----|
| <b>Figure S1</b> The IR spectrum of complex <b>1</b> .....                                                           | 3  |
| <b>Figure S2</b> The IR spectrum of complex <b>2</b> .....                                                           | 3  |
| <b>Figure S3</b> The IR spectrum of complex <b>3</b> .....                                                           | 4  |
| <b>Figure S4</b> The IR spectrum of complex <b>4</b> .....                                                           | 4  |
| <b>Figure S5</b> The IR spectrum of complex <b>5</b> .....                                                           | 5  |
| <b>Figure S6</b> The IR spectrum of complex <b>6</b> .....                                                           | 5  |
| <b>Figure S7</b> The IR spectrum of complex <b>7</b> .....                                                           | 6  |
| <b>Figure S8</b> The IR spectrum of complex <b>8</b> .....                                                           | 6  |
| <b>Figure S9</b> The IR spectrum of complex <b>9</b> .....                                                           | 7  |
| <b>Figure S10</b> The ESI-MS spectrum of complex <b>1</b> .....                                                      | 7  |
| <b>Figure S11</b> The ESI-MS spectrum of complex <b>2</b> .....                                                      | 8  |
| <b>Figure S12</b> The ESI-MS spectrum of complex <b>3</b> .....                                                      | 8  |
| <b>Figure S13</b> The ESI-MS spectrum of complex <b>4</b> .....                                                      | 9  |
| <b>Figure S14</b> The ESI-MS spectrum of complex <b>5</b> .....                                                      | 9  |
| <b>Figure S15</b> The ESI-MS spectrum of complex <b>6</b> .....                                                      | 10 |
| <b>Figure S16</b> The ESI-MS spectrum of complex <b>7</b> .....                                                      | 10 |
| <b>Figure S17</b> The ESI-MS spectrum of complex <b>8</b> .....                                                      | 11 |
| <b>Figure S18</b> The ESI-MS spectrum of complex <b>9</b> .....                                                      | 11 |
| <b>Figure S19</b> Stacking diagram of complexes <b>1-5</b> structure .....                                           | 12 |
| <b>Figure S20</b> Fe2p XPS spectra of complexes <b>1-2</b> .....                                                     | 12 |
| <b>Figure S21</b> XPS survey scan of complexes <b>1(a)</b> and <b>2(b)</b> .....                                     | 12 |
| <b>Figure. S22</b> The microscopic images of SiHa cells after treating with complexes <b>1-9</b> and cisplatin ..... | 14 |
| <b>Figure. S23</b> The microscopic images of Bel-7402 cells after treating with complexes <b>1-9</b> and .....       |    |

|                                                                                                                                                                                                                                                                               |    |
|-------------------------------------------------------------------------------------------------------------------------------------------------------------------------------------------------------------------------------------------------------------------------------|----|
| cisplatin.....                                                                                                                                                                                                                                                                | 16 |
| <b>Figure. S24</b> The microscopic images of Eca-109 cells after treating with complexes <b>1-9</b> and cisplatin.....                                                                                                                                                        | 18 |
| <b>Figure. S25</b> The microscopic images of HL-7702 cells after treating with complexes <b>1-9</b> and cisplatin.....                                                                                                                                                        | 20 |
| <b>Figure. S26</b> UV spectra of complexes <b>1-9</b> in Tris-HCl buffer (pH 7.2) recorded at different times (within 24 h) at room temperature .....                                                                                                                         | 21 |
| <b>Figure S27</b> Absorption spectra of 15 $\mu$ M of complexes <b>1-2(a-b)</b> and <b>4-9(c-h)</b> in a Tris-HCl buffer (pH = 7.2) solution with series concentrations of CT-DNA. The plots of $A_0/(A-A_0)$ versus the concentration of CT-DNA are shown as the insets..... | 22 |
| <b>Figure S28</b> CD spectra of complexes <b>1-2(a-b)</b> and <b>4-9(c-h)</b> to CT-DNA at different concentration ratios.....                                                                                                                                                | 23 |
| <b>Figure S29</b> The most favorable conformation of complex <b>2</b> bound with oligonucleotide (4JD8) .                                                                                                                                                                     | 24 |
| <b>Figure S30</b> The most favorable conformation of complex <b>3</b> bound with oligonucleotide (4JD8) .                                                                                                                                                                     | 24 |
| <b>Figure S31</b> The most favorable conformation of complex <b>4</b> bound with oligonucleotide (4JD8) .                                                                                                                                                                     | 25 |
| <b>Figure S32</b> The most favorable conformation of complex <b>5</b> bound with oligonucleotide (4JD8) .                                                                                                                                                                     | 25 |
| <b>Figure S33</b> The most favorable conformation of complex <b>1</b> bound with DNA-Topo I (1SC7).....                                                                                                                                                                       | 26 |
| <b>Figure S34</b> The most favorable conformation of complex <b>2</b> bound with DNA-Topo I (1SC7).....                                                                                                                                                                       | 26 |
| <b>Figure S35</b> The most favorable conformation of complex <b>4</b> bound with DNA-Topo I (1SC7).....                                                                                                                                                                       | 27 |
| <b>Figure S36</b> The most favorable conformation of complex <b>5</b> bound with DNA-Topo I (1SC7).....                                                                                                                                                                       | 27 |
| <b>Figure S37</b> The most favorable conformation of complex <b>1</b> bound with BSA (4F5S) .....                                                                                                                                                                             | 28 |
| <b>Figure S38</b> The most favorable conformation of complex <b>2</b> bound with BSA (4F5S) .....                                                                                                                                                                             | 28 |
| <b>Figure S39</b> The most favorable conformation of complex <b>4</b> bound with BSA (4F5S) .....                                                                                                                                                                             | 29 |
| <b>Figure S40</b> The most favorable conformation of complex <b>5</b> bound with BSA (4F5S) .....                                                                                                                                                                             | 29 |
| <b>Figure S41</b> Fluorescence spectra of 20 $\mu$ M BSA in the absence (dotted line) and presence (2-20 $\mu$ M) of complexes <b>1-2(a-b)</b> and <b>4-9(c-h)</b> (solid line).....                                                                                          | 30 |
| <b>Figure S42</b> CD spectra of complexes <b>1-2(a-b)</b> and <b>4-9(c-h)</b> to BSA at different concentration ratios .....                                                                                                                                                  | 31 |
| <b>Table S1</b> Percentage of element content measured in XPS .....                                                                                                                                                                                                           | 32 |

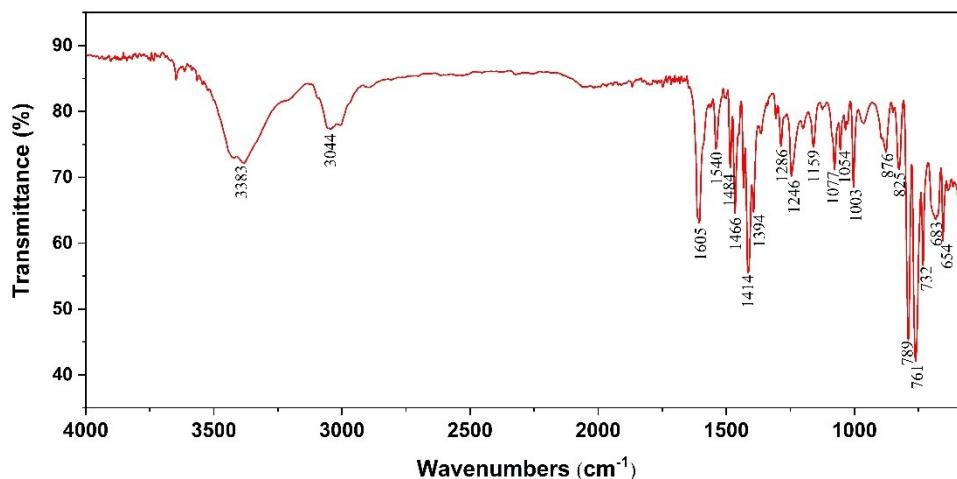

**Figure S1** The IR spectrum of complex **1**

[FeBr<sub>2</sub>L<sub>2</sub><sup>1</sup>] (**1**): IR (KBr, cm<sup>-1</sup>): 3383 (m,  $\nu_{O-H}$ ), 3044 (m,  $\nu_{C-H}$ ), 1605 (s,  $\nu_{C=C}$ ), 1540 (m,  $\nu_{C=C}$ ), 1484 (m,  $\nu_{C=C}$ ), 1466 (m,  $\nu_{C=C}$ ), 1414 (s,  $\nu_{C=C}$ ), 1394 (m,  $\nu_{C=C}$ ), 1286 (w,  $\beta_{C-H}$ ), 1246 (m,  $\beta_{C-H}$ ), 1159 (m,  $\beta_{C-H}$ ), 1077 (m,  $\beta_{C-H}$ ), 1054 (w,  $\beta_{C-H}$ ), 1003 (m,  $\beta_{C-H}$ ), 876 (m,  $\gamma_{C-H}$ ), 825 (m,  $\gamma_{C-H}$ ), 789 (s,  $\gamma_{C-H}$ ), 761 (s,  $\gamma_{C-H}$ ), 732 (m,  $\gamma_{C-H}$ ), 683 (w,  $\gamma_{C-H}$ ), 654 (m). Elemental analysis: Anal. calcd for C<sub>42</sub>H<sub>32</sub>N<sub>6</sub>Br<sub>2</sub>Fe·1.3HBr: C, 53.39; H, 3.36; N, 8.94, Found: C, 53.58; H, 3.77; N, 9.01.

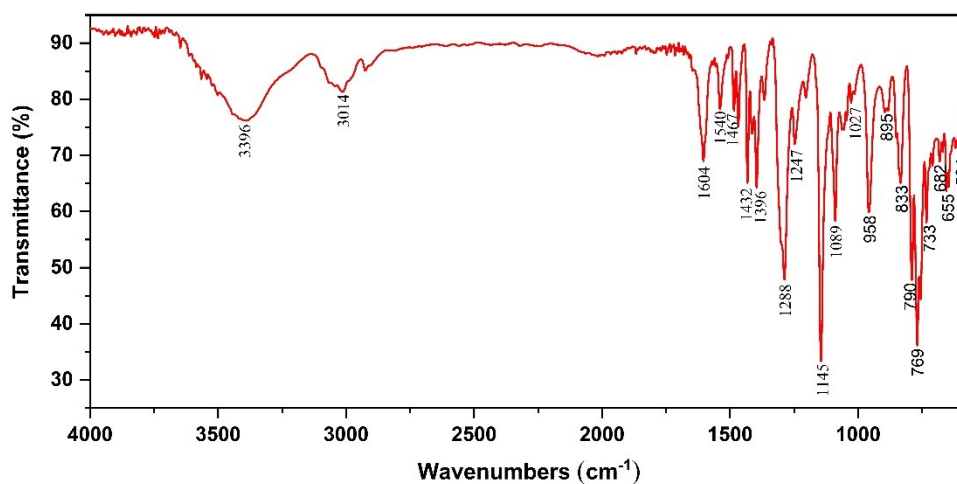

**Figure S2** The IR spectrum of complex **2**

[FeBr<sub>2</sub>L<sub>2</sub><sup>2</sup>] (**2**): IR (KBr, cm<sup>-1</sup>): 3396 (m,  $\nu_{O-H}$ ), 3014 (m,  $\nu_{C-H}$ ), 1604 (m,  $\nu_{C=C}$ ), 1540 (m,  $\nu_{C=C}$ ), 1467 (m,  $\nu_{C=C}$ ), 1432 (m,  $\nu_{C=C}$ ), 1396 (m,  $\nu_{C=C}$ ), 1288 (s,  $\nu_{SO_2}$ ), 1247 (m,  $\beta_{C-H}$ ), 1145 (s,  $\nu_{SO_2}$ ), 1089 (m,  $\beta_{C-H}$ ), 1027 (m,  $\beta_{C-H}$ ), 958 (m), 895 (m,  $\gamma_{C-H}$ ), 833 (m,  $\gamma_{C-H}$ ), 790 (m,  $\gamma_{C-H}$ ), 769 (s,  $\nu_{SO_2}$ ), 733 (m,  $\gamma_{C-H}$ ), 682 (w,  $\gamma_{C-H}$ ), 655 (m), 646 (m), 553 (s,  $\delta_{SO_2}$ ). Elemental analysis: Anal. calcd for C<sub>44</sub>H<sub>34</sub>O<sub>4</sub>S<sub>2</sub>N<sub>6</sub>Br<sub>2</sub>Fe·4H<sub>2</sub>O: C, 49.73; H, 3.98; N, 7.91, Found: C, 49.41; H, 4.00; N, 7.84.

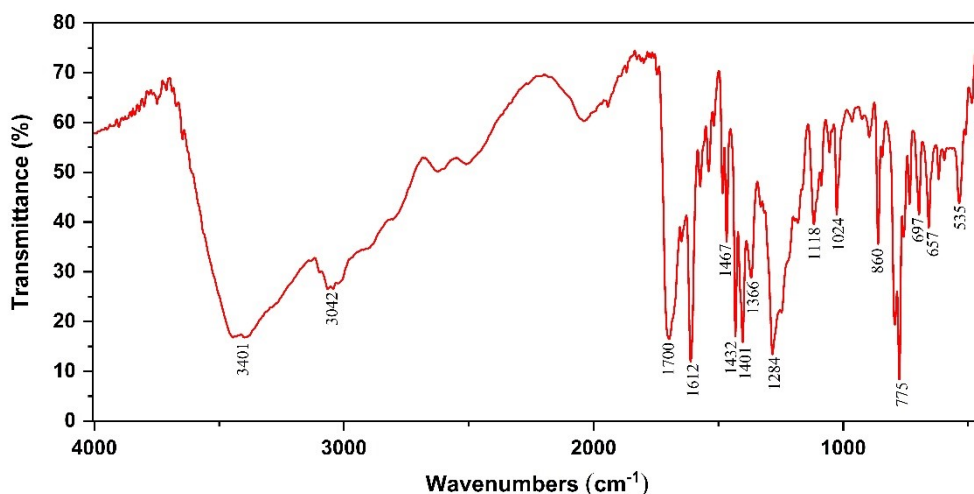

**Figure S3** The IR spectrum of complex **3**

[FeBr<sub>2</sub>L<sub>2</sub><sup>3</sup>] (**3**): IR (KBr, cm<sup>-1</sup>): 3401 (m,  $\nu_{O-H}$ ), 3042 (m,  $\nu_{C-H}$ ), 1700 (s,  $\nu_{C=O}$ ), 1612 (s,  $\nu_{C=C}$ ), 1467 (m,  $\nu_{C=C}$ ), 1432 (s,  $\nu_{C=C}$ ), 1401 (s,  $\nu_{C=C}$ ), 1366 (m,  $\nu_{C-O}$ ), 1284 (s,  $\nu_{C-O}$ ), 1118 (m,  $\beta_{C-H}$ ), 1024 (m,  $\beta_{C-H}$ ), 860 (m,  $\gamma_{C-H}$ ), 775 (s,  $\gamma_{C-H}$ ), 697 (m,  $\gamma_{C-H}$ ), 657 (m), 535 (m). Elemental analysis: Anal. calcd for C<sub>44</sub>H<sub>30</sub>O<sub>4</sub>N<sub>6</sub>Br<sub>2</sub>Fe·6H<sub>2</sub>O: C, 51.28; H, 4.11; N, 8.16, Found: C, 51.05; H, 3.82; N, 8.14.

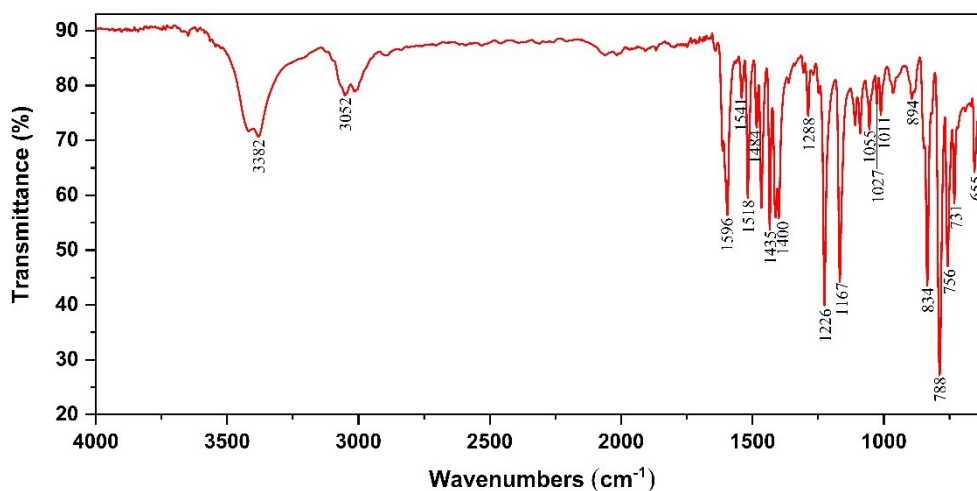

**Figure S4** The IR spectrum of complex **4**

[FeBr<sub>2</sub>L<sub>2</sub><sup>4</sup>] (**4**): IR (KBr, cm<sup>-1</sup>): 3382 (m,  $\nu_{O-H}$ ), 3052 (m,  $\nu_{C-H}$ ), 1596 (m,  $\nu_{C=C}$ ), 1541 (w,  $\nu_{C=C}$ ), 1518 (m,  $\nu_{C=C}$ ), 1484 (w,  $\nu_{C=C}$ ), 1435 (m,  $\nu_{C=C}$ ), 1400 (m), 1288 (m,  $\beta_{C-H}$ ), 1226 (s,  $\nu_{C-F}$ ), 1167 (s,  $\beta_{C-H}$ ), 1109 (m,  $\beta_{C-H}$ ), 1055 (m,  $\beta_{C-H}$ ), 1027 (m,  $\beta_{C-H}$ ), 1011 (m,  $\beta_{C-H}$ ), 894 (w,  $\gamma_{C-H}$ ), 834 (s,  $\gamma_{C-H}$ ), 788 (s,  $\gamma_{C-H}$ ), 756 (s,  $\gamma_{C-H}$ ), 731 (m,  $\gamma_{C-H}$ ), 655 (m). Elemental analysis: Anal. calcd for C<sub>42</sub>H<sub>28</sub>N<sub>6</sub>F<sub>2</sub>Br<sub>2</sub>Fe·4H<sub>2</sub>O: C, 53.53; H, 3.85; N, 8.92, Found: C, 53.72; H, 3.45; N, 9.13.

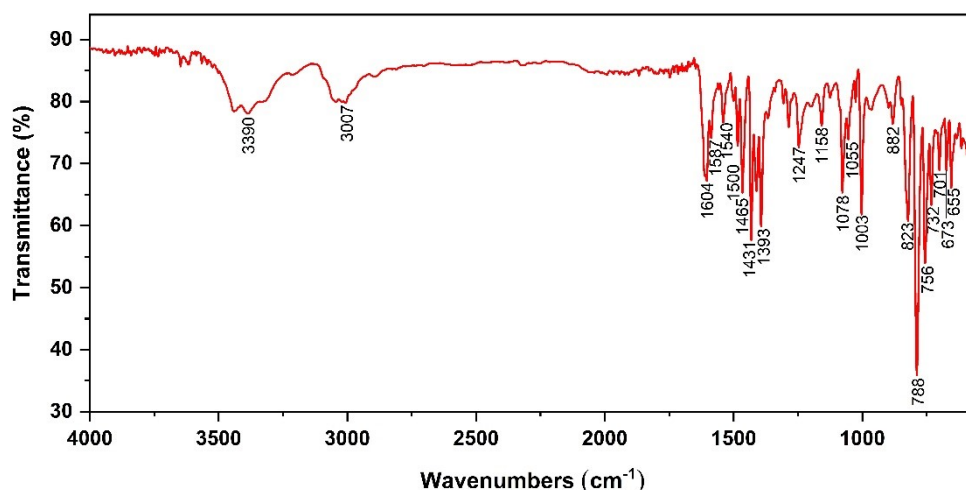

**Figure S5** The IR spectrum of complex **5**

[FeBr<sub>2</sub>L<sub>2</sub><sup>5</sup>] (**5**): IR (KBr, cm<sup>-1</sup>): 3390 (m,  $\nu_{O-H}$ ), 3007 (m,  $\nu_{C-H}$ ), 1604 (m,  $\nu_{C=C}$ ), 1587 (m,  $\nu_{C=C}$ ), 1540 (m,  $\nu_{C=C}$ ), 1500 (w,  $\nu_{C=C}$ ), 1465 (m,  $\nu_{C=C}$ ), 1431 (s,  $\nu_{C=C}$ ), 1393 (s,  $\nu_{C=C}$ ), 1247 (m,  $\beta_{C-H}$ ), 1158 (m,  $\beta_{C-H}$ ), 1077 (m,  $\beta_{C-H}$ ), 1055 (m,  $\beta_{C-H}$ ), 1026 (w,  $\beta_{C-H}$ ), 1003 (s,  $\beta_{C-H}$ ), 882 (w,  $\gamma_{C-H}$ ), 823 (m,  $\gamma_{C-H}$ ), 788 (s,  $\gamma_{C-H}$ ), 756 (s,  $\gamma_{C-H}$ ), 731 (m,  $\gamma_{C-H}$ ), 701 (m,  $\gamma_{C-H}$ ), 673, 655 (m,  $\gamma_{C-Br}$ ). Elemental analysis: Anal. calcd for C<sub>42</sub>H<sub>28</sub>N<sub>6</sub>Br<sub>4</sub>Fe·4H<sub>2</sub>O: C, 47.40; H, 3.41; N, 7.90, Found: C, 47.51; H, 3.22; N, 7.98.

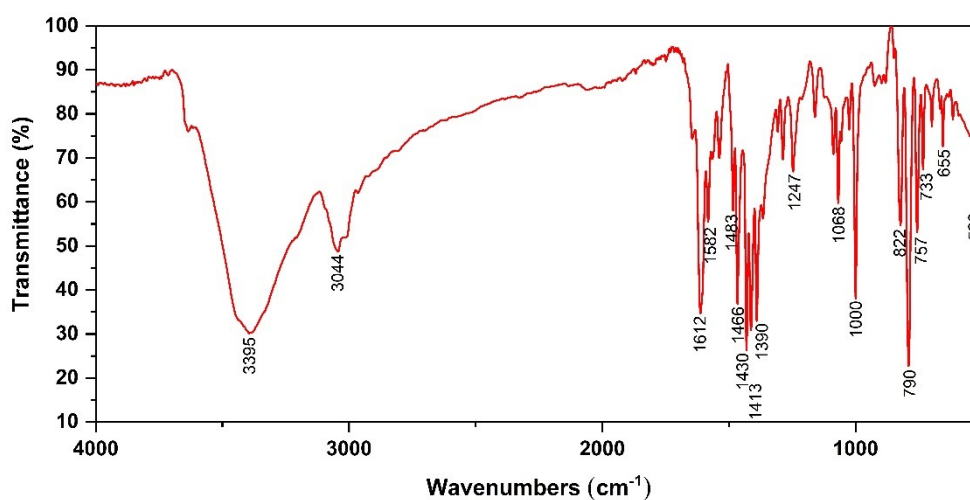

**Figure S6** The IR spectrum of complex **6**

[FeBr<sub>2</sub>L<sub>2</sub><sup>6</sup>] (**6**): IR (KBr, cm<sup>-1</sup>): 3395 (m,  $\nu_{O-H}$ ), 3044 (m,  $\nu_{C-H}$ ), 1612 (s,  $\nu_{C=C}$ ), 1582 (m,  $\nu_{C=C}$ ), 1483 (m,  $\nu_{C=C}$ ), 1446 (s,  $\nu_{C=C}$ ), 1430 (s,  $\nu_{C=C}$ ), 1413 (s,  $\nu_{C=C}$ ), 1390 (s), 1247 (m,  $\beta_{C-H}$ ), 1068 (m,  $\beta_{C-H}$ ), 1000 (m,  $\beta_{C-H}$ ), 822 (m,  $\gamma_{C-H}$ ), 790 (s,  $\gamma_{C-H}$ ), 757 (m,  $\gamma_{C-H}$ ), 733 (m,  $\gamma_{C-H}$ ), 655 (m), 523 (m,  $\gamma_{C-I}$ ). Elemental analysis: Anal. calcd for C<sub>42</sub>H<sub>28</sub>N<sub>6</sub>Br<sub>2</sub>I<sub>2</sub>Fe·5H<sub>2</sub>O: C, 42.89; H, 3.26; N, 7.14, Found: C, 42.41; H, 3.27; N, 7.02.

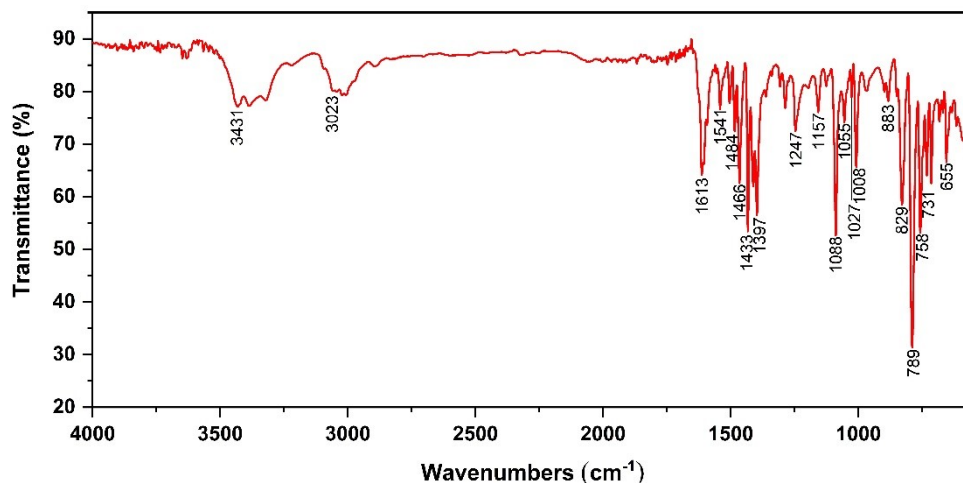

**Figure S7** The IR spectrum of complex **7**

[FeBr<sub>2</sub>L<sub>2</sub><sup>7</sup>] (**7**): IR (KBr, cm<sup>-1</sup>): 3431 (m,  $\nu_{\text{O-H}}$ ), 3023 (m,  $\nu_{\text{C-H}}$ ), 1613 (m,  $\nu_{\text{C=C}}$ ), 1541 (m,  $\nu_{\text{C=C}}$ ), 1484 (m,  $\nu_{\text{C=C}}$ ), 1466 (m,  $\nu_{\text{C=C}}$ ), 1433 (s,  $\nu_{\text{C=C}}$ ), 1397 (m), 1247 (m,  $\beta_{\text{C-H}}$ ), 1157 (m,  $\beta_{\text{C-H}}$ ), 1088 (s,  $\beta_{\text{C-H}}$ ), 1054 (m,  $\beta_{\text{C-H}}$ ), 1026 (w,  $\beta_{\text{C-H}}$ ), 1008 (m,  $\beta_{\text{C-H}}$ ), 883 (m,  $\gamma_{\text{C-H}}$ ), 829 (s,  $\gamma_{\text{C-H}}$ ), 789 (s,  $\gamma_{\text{C-H}}$ ), 758 (m,  $\gamma_{\text{C-H}}$ ), 731 (m,  $\gamma_{\text{C-Cl}}$ ), 655 (m). Elemental analysis: Anal. calcd for C<sub>42</sub>H<sub>28</sub>N<sub>6</sub>Cl<sub>2</sub>Br<sub>2</sub>Fe·3H<sub>2</sub>O: C, 52.69; H, 3.58; N, 8.78, Found: C, 52.78; H, 3.64; N, 8.85.

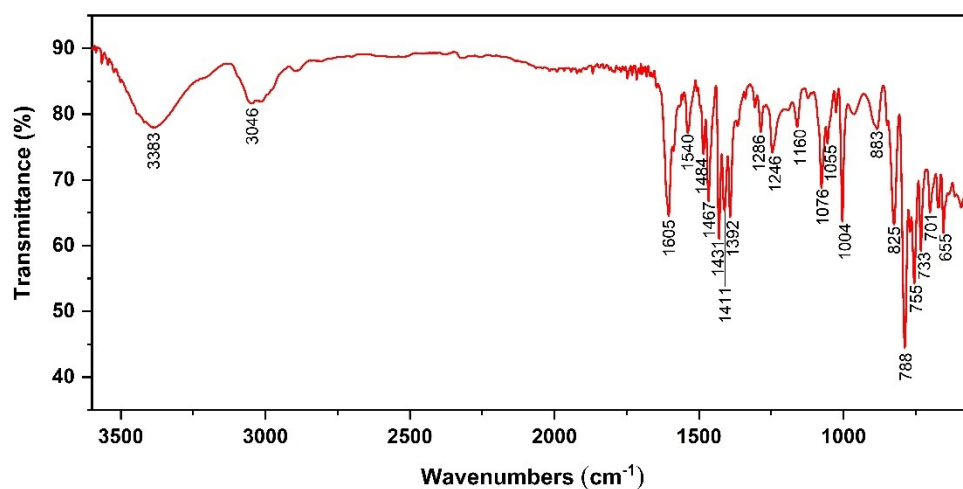

**Figure S8** The IR spectrum of complex **8**

[FeBr<sub>2</sub>L<sub>2</sub><sup>8</sup>] (**8**): IR (KBr, cm<sup>-1</sup>): 3383 (m,  $\nu_{\text{O-H}}$ ), 3046 (m,  $\nu_{\text{C-H}}$ ), 1605 (s,  $\nu_{\text{C=C}}$ ), 1540 (m,  $\nu_{\text{C=C}}$ ), 1484 (m,  $\nu_{\text{C=C}}$ ), 1466 (m,  $\nu_{\text{C=C}}$ ), 1431 (s,  $\nu_{\text{C=C}}$ ), 1411 (m,  $\nu_{\text{C=C}}$ ), 1392 (m,  $\nu_{\text{C=C}}$ ), 1286 (w,  $\beta_{\text{C-H}}$ ), 1246 (m,  $\beta_{\text{C-H}}$ ), 1160 (w,  $\beta_{\text{C-H}}$ ), 1076 (m,  $\beta_{\text{C-H}}$ ), 1055 (w,  $\beta_{\text{C-H}}$ ), 1004 (s,  $\beta_{\text{C-H}}$ ), 883 (m,  $\gamma_{\text{C-H}}$ ), 825 (s,  $\gamma_{\text{C-H}}$ ), 788 (s,  $\gamma_{\text{C-H}}$ ), 755 (m,  $\gamma_{\text{C-H}}$ ), 733 (m,  $\gamma_{\text{C-H}}$ ), 701 (m), 655 (m). Elemental analysis: Anal. calcd for C<sub>54</sub>H<sub>38</sub>N<sub>6</sub>Br<sub>2</sub>Fe·8H<sub>2</sub>O: C, 57.36; H, 4.81; N, 7.43, Found: C, 57.58; H, 4.93; N, 7.58.

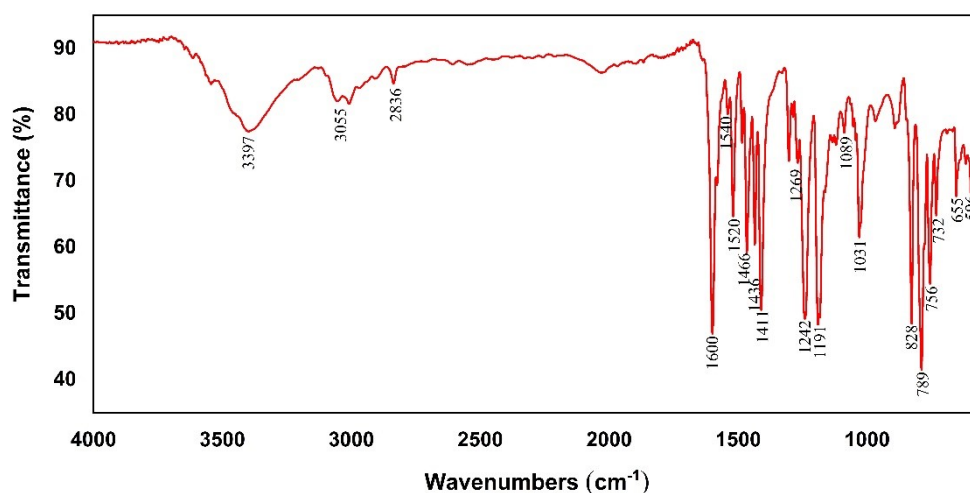

**Figure S9** The IR spectrum of complex **9**

[FeBr<sub>2</sub>L<sub>2</sub><sup>9</sup>] (**9**): IR (KBr, cm<sup>-1</sup>): 3397 (m,  $\nu_{\text{O-H}}$ ), 3055 (m,  $\nu_{\text{C-H}}$ ), 2836 (m,  $\nu_{\text{C-H}}$ ), 1600 (s,  $\nu_{\text{C=C}}$ ), 1540 (w,  $\nu_{\text{C=C}}$ ), 1520 (m,  $\nu_{\text{C=C}}$ ), 1466 (m,  $\delta_{\text{C=C}}$ ), 1436 (m,  $\nu_{\text{C=C}}$ ), 1411 (s,  $\nu_{\text{C=C}}$ ), 1269 (w,  $\beta_{\text{C-H}}$ ), 1242 (s,  $\nu_{\text{C-O-C}}$ ), 1191 (s,  $\beta_{\text{C-H}}$ ), 1089 (m,  $\beta_{\text{C-H}}$ ), 1031 (m,  $\beta_{\text{C-H}}$ ), 828 (s,  $\gamma_{\text{C-H}}$ ), 789 (s,  $\gamma_{\text{C-H}}$ ), 756 (s,  $\gamma_{\text{C-H}}$ ), 732 (m,  $\gamma_{\text{C-H}}$ ), 655 (m), 596 (m). Elemental analysis: Anal. calcd for C<sub>44</sub>H<sub>34</sub>O<sub>2</sub>N<sub>6</sub>Br<sub>2</sub>Fe·5H<sub>2</sub>O·C, 53.68; H, 4.50; N, 8.54, Found: C, 53.47; H, 4.45; N, 8.47.

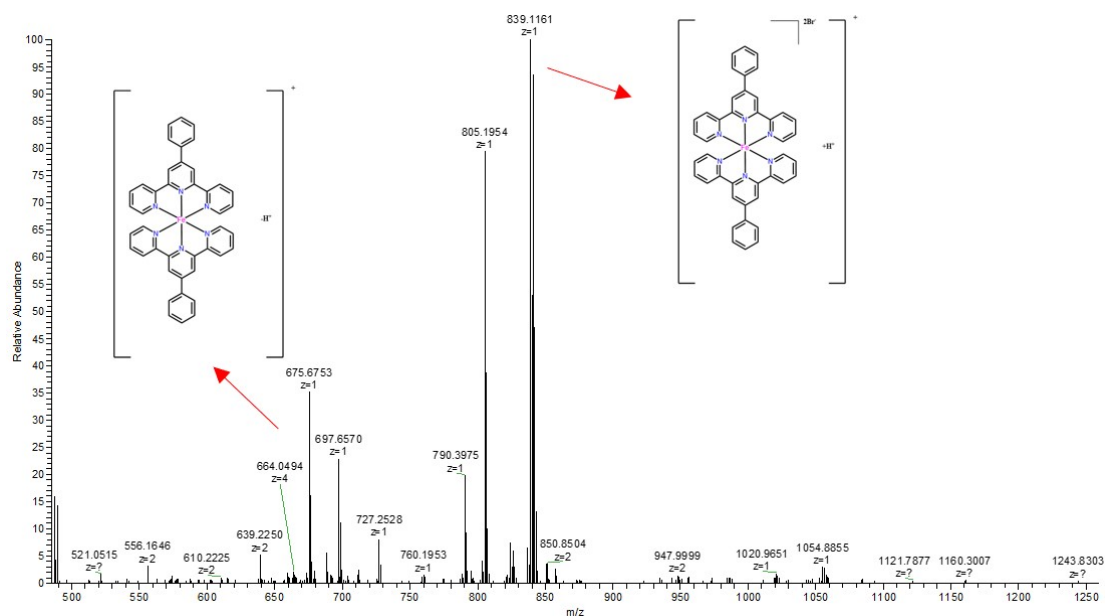

**Figure S10** The ESI-MS spectrum of complex **1**  
(ESI-MS: [FeL<sub>2</sub><sup>1</sup> - H<sup>+</sup>]<sup>+</sup>: 675.6753, [FeBr<sub>2</sub>L<sub>2</sub><sup>1</sup> + H<sup>+</sup>]<sup>+</sup>: 839.1161)

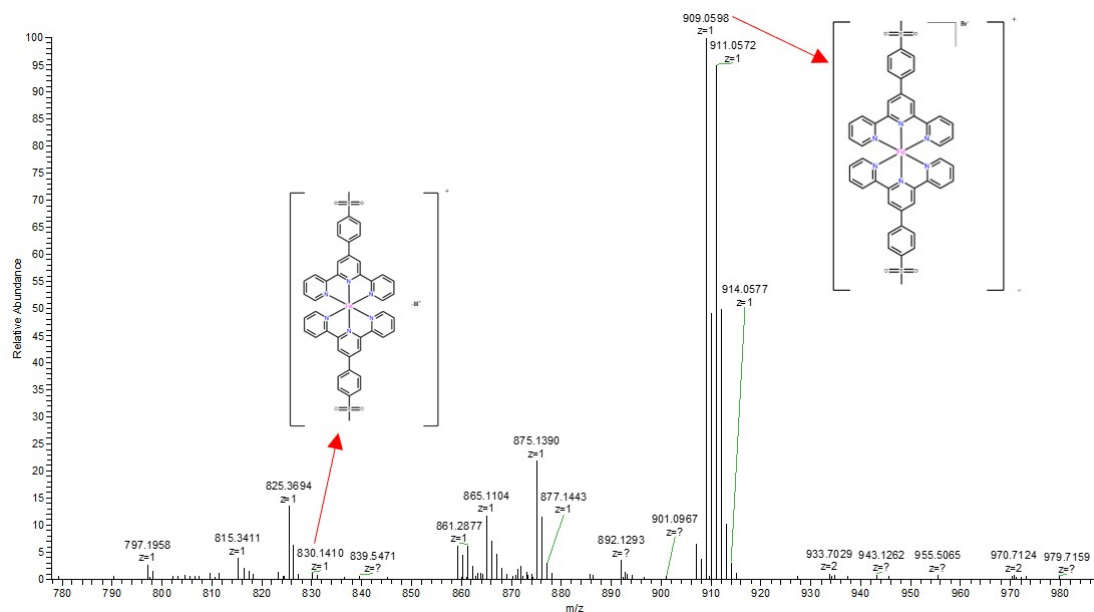

**Figure S11** The ESI-MS spectrum of complex **2**  
 (ESI-MS:  $[FeL_2^2 - H^+]^+$ : 830.1410,  $[FeBrL_2^2]^+$ : 909.0598)

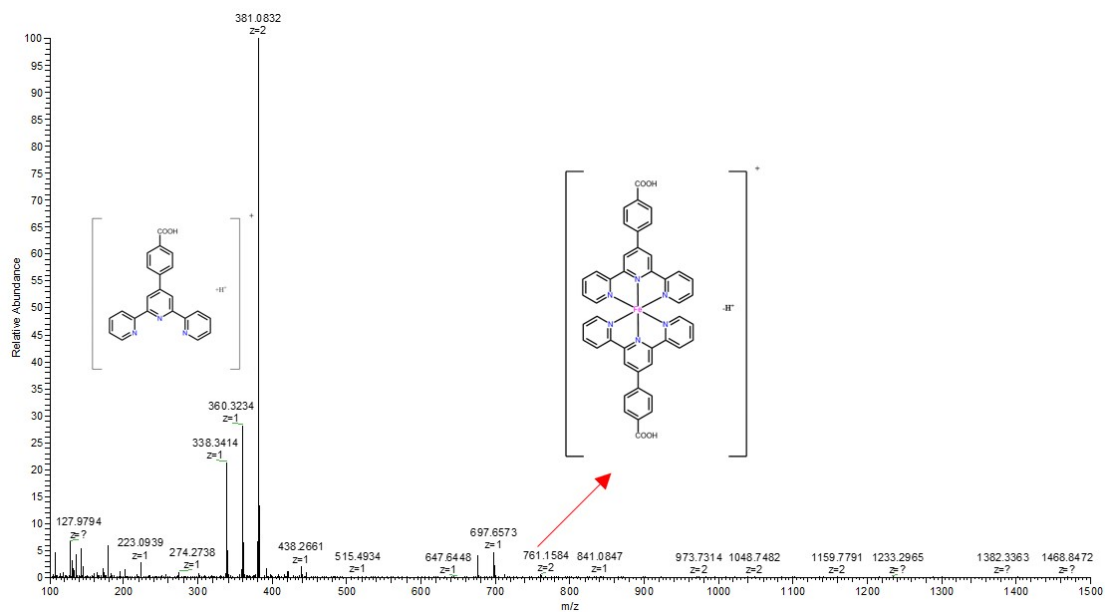

**Figure S12** The ESI-MS spectrum of complex **3**  
 (ESI-MS:  $[L_1^3 + H^+]^+$ : 360.3234,  $[FeL_2^3 - H^+]^+$ : 761.1584)



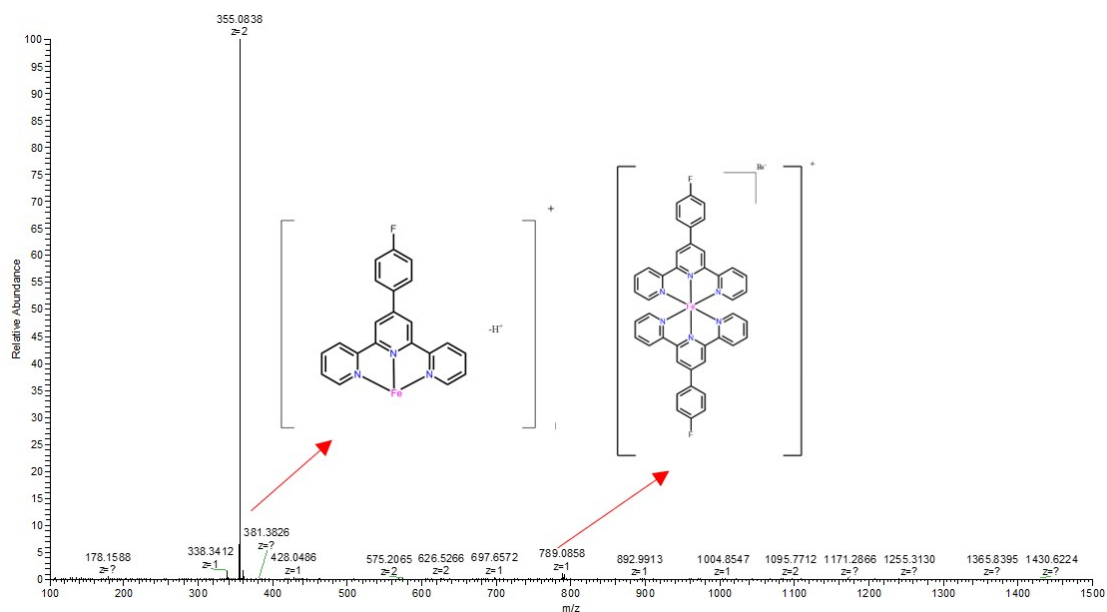

**Figure S13** The ESI-MS spectrum of complex 4  
(ESI-MS:  $[\text{FeL}_1^4 - \text{H}^+]^+$ : 381.3826,  $[\text{FeBrL}_2^4]^+$ : 789.0858)

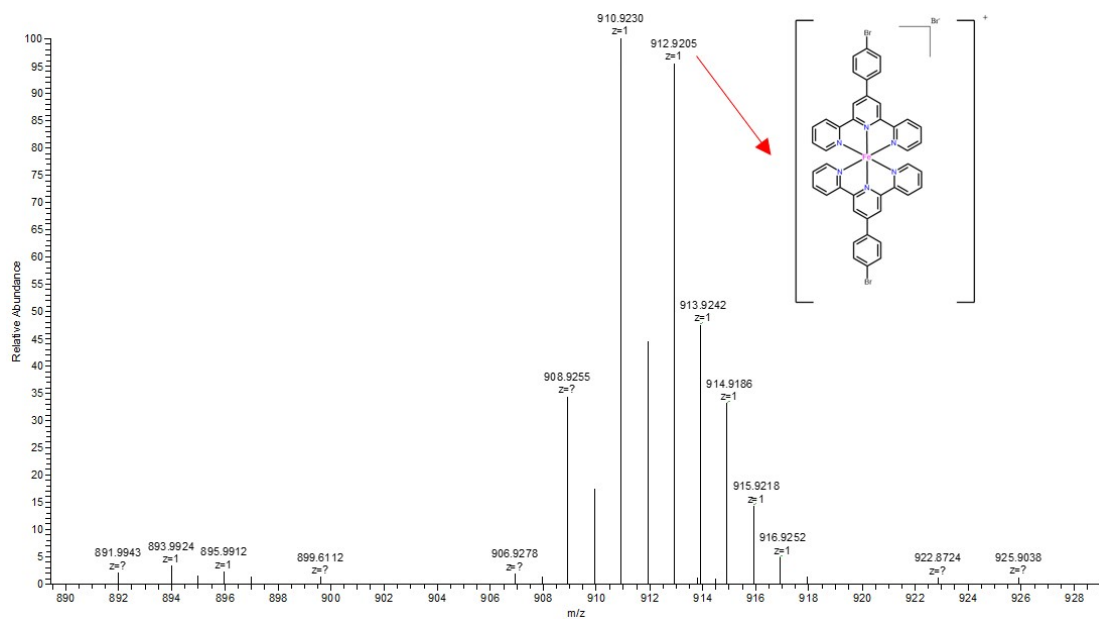

**Figure S14** The ESI-MS spectrum of complex 5  
(ESI-MS:  $[\text{FeBrL}_2^5]^+$ : 912.9205)

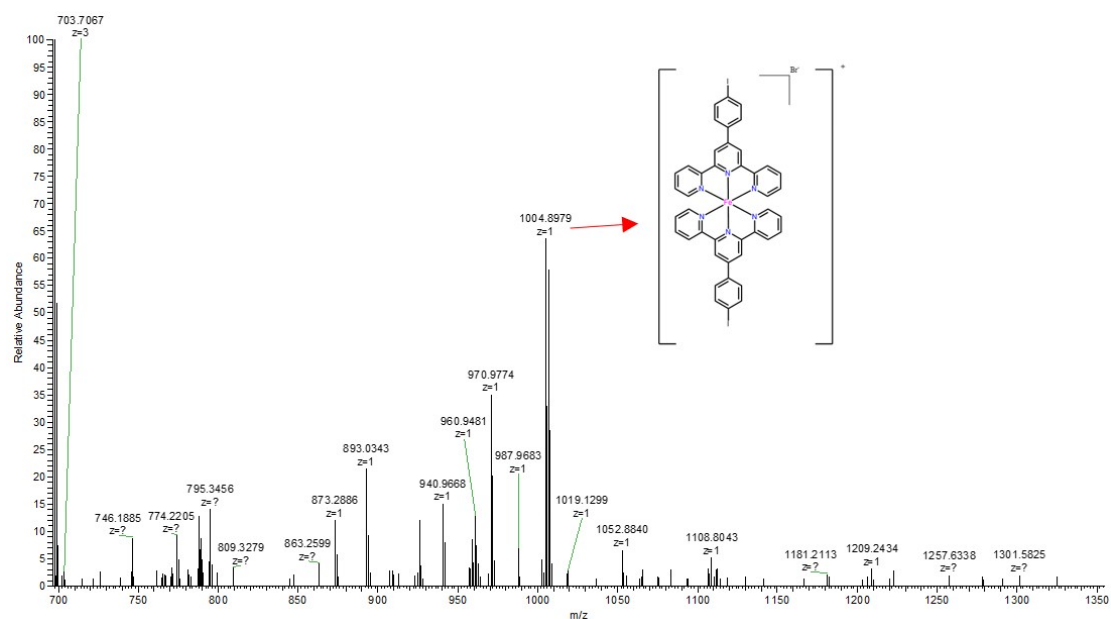

**Figure S15** The ESI-MS spectrum of complex 6  
(ESI-MS:  $[\text{FeBrL}_2]^+$ : 1004.8979)

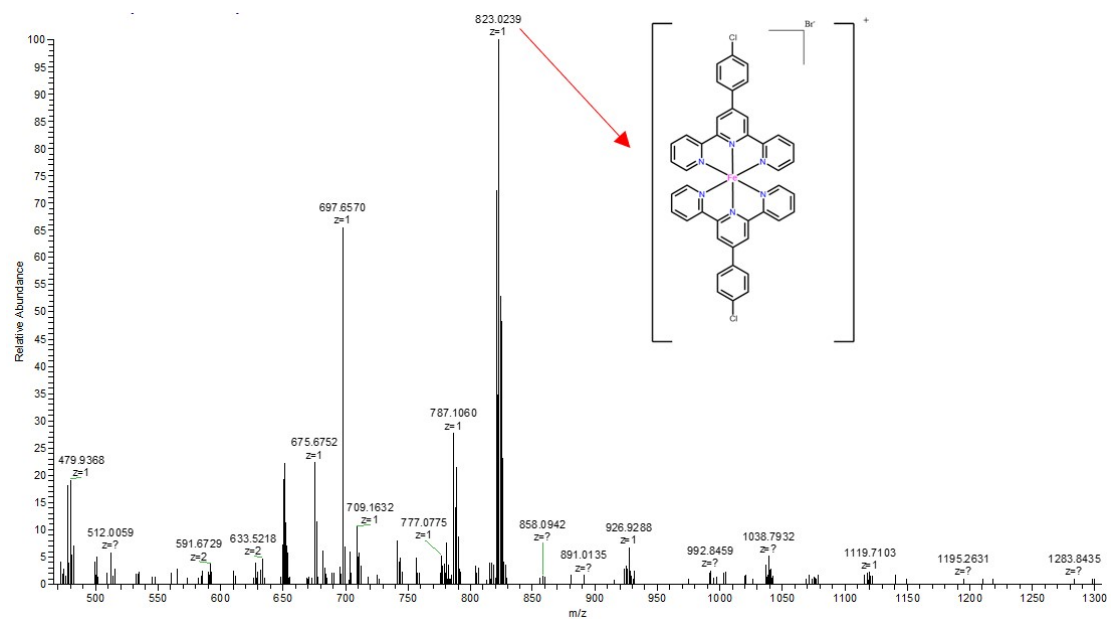

**Figure S16** The ESI-MS spectrum of complex 7  
(ESI-MS:  $[\text{FeBrL}_2]^+$ : 823.0239)

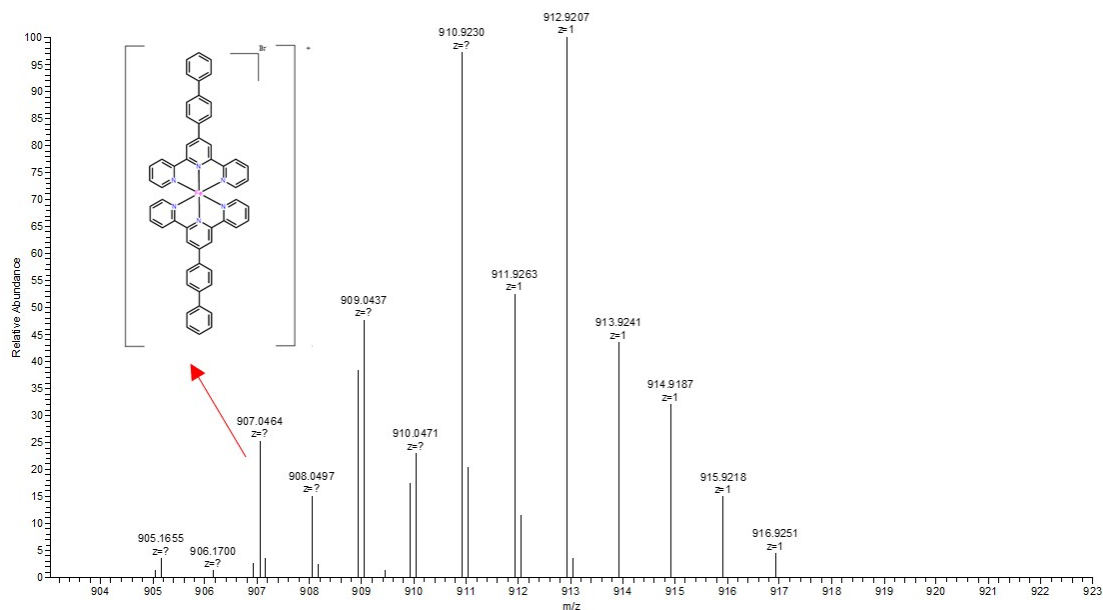

**Figure S17** The ESI-MS spectrum of complex **8**

(ESI-MS:  $[\text{FeBrL}_2^8]^+$ : 907.0464)

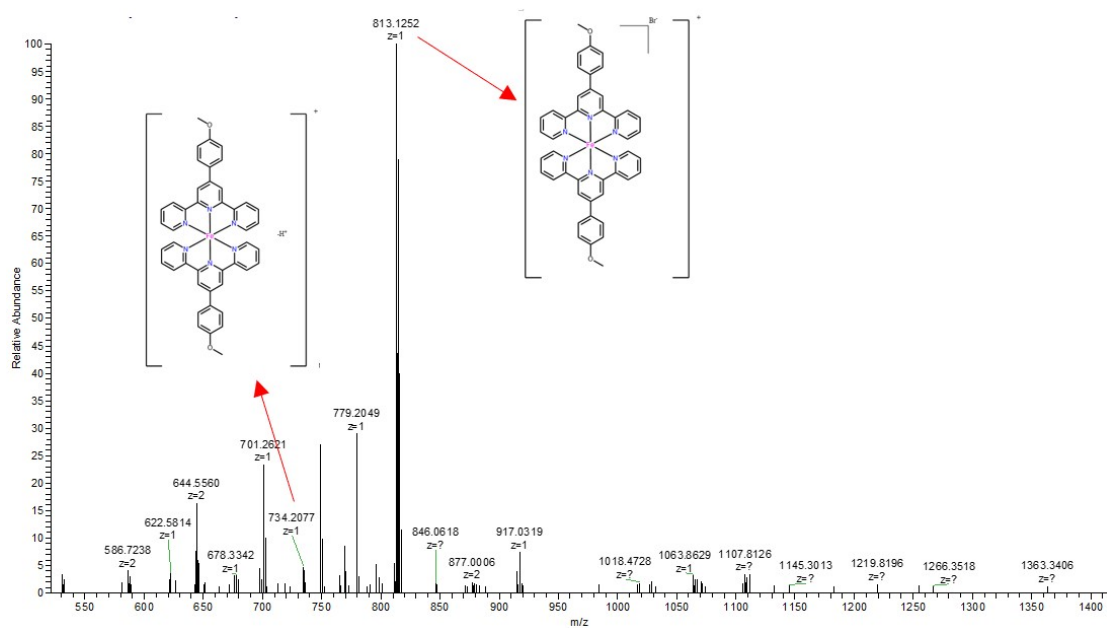

**Figure S18** The ESI-MS spectrum of complex **9**

(ESI-MS:  $[\text{FeL}_1^9 - \text{H}^+]^+$ : 734.2077,  $[\text{FeBrL}_2^9]^+$ : 813.1252)

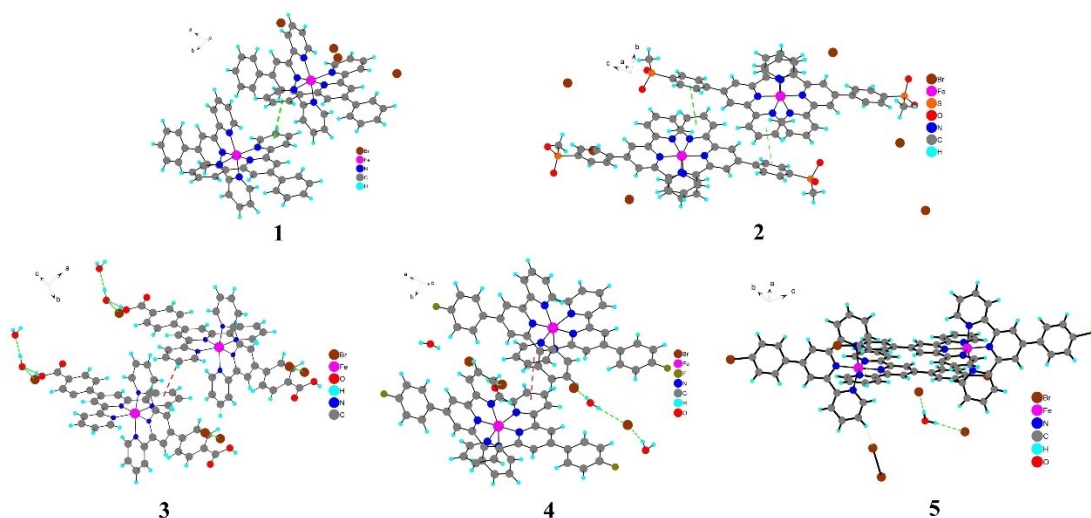

**Figure S19** Stacking diagram of complexes 1-5 structure

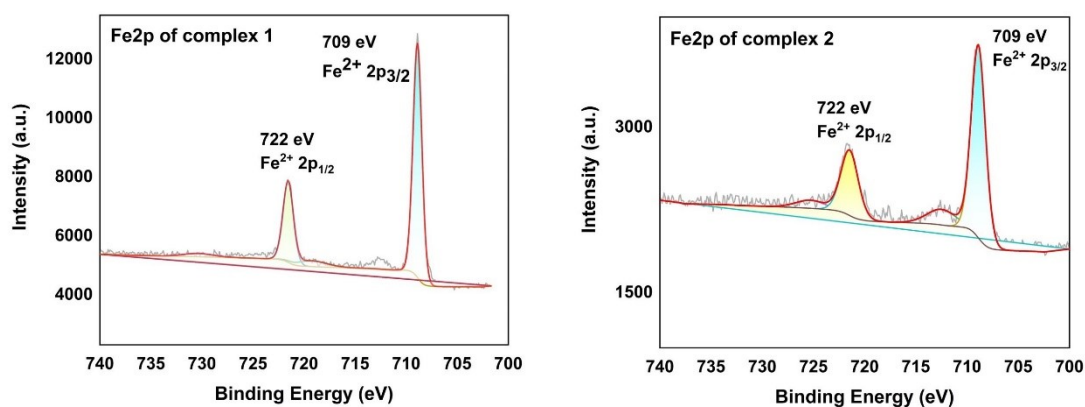

**Figure S20** Fe2p XPS spectra of complexes 1-2

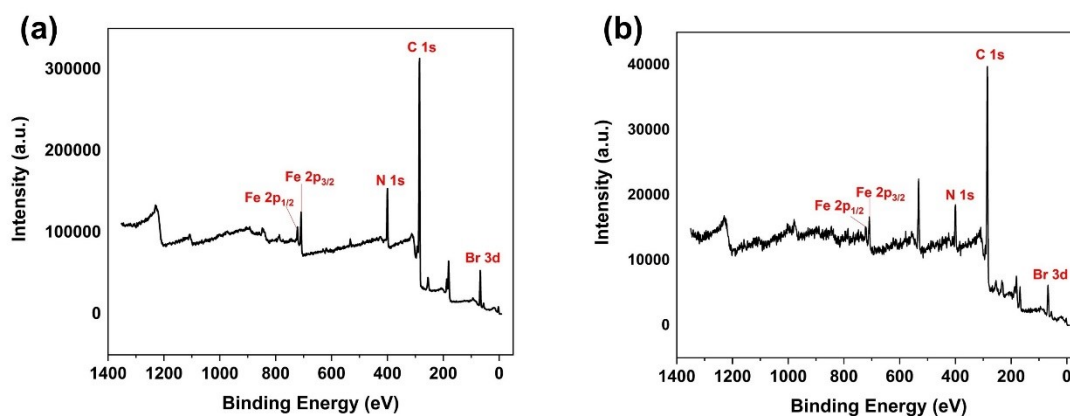

**Figure S21** XPS survey scan of complexes 1(a) and 2(b)

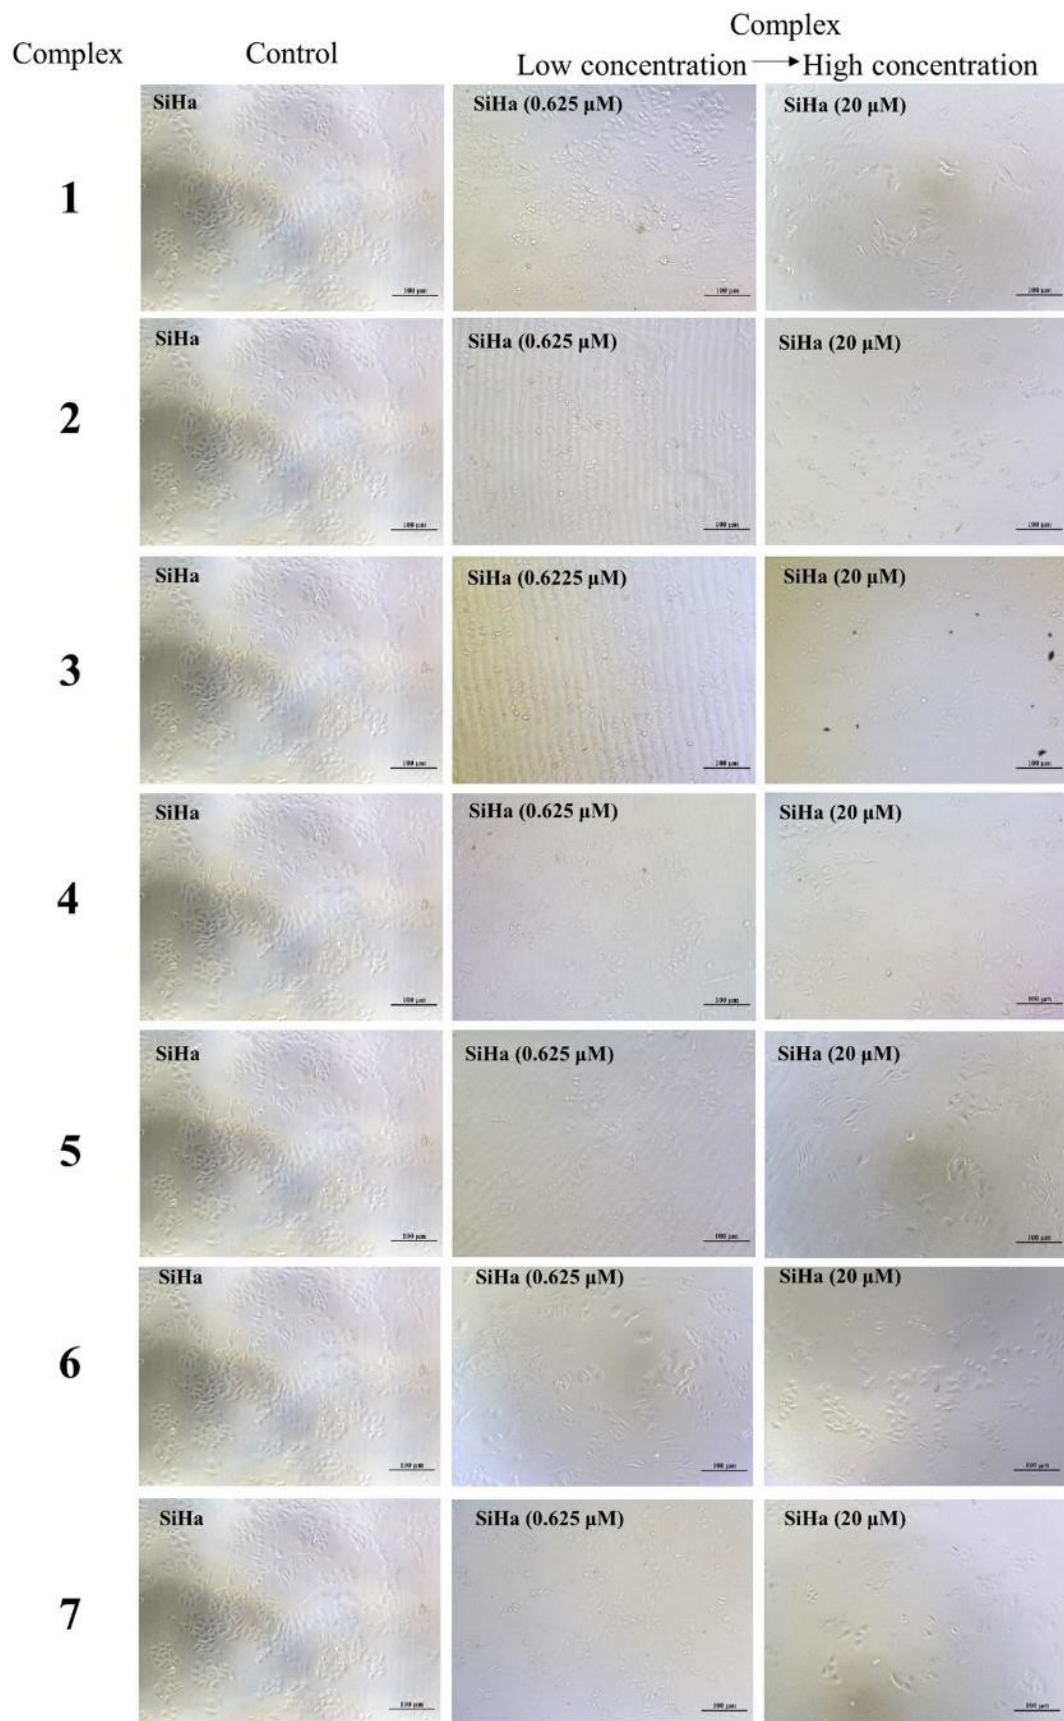

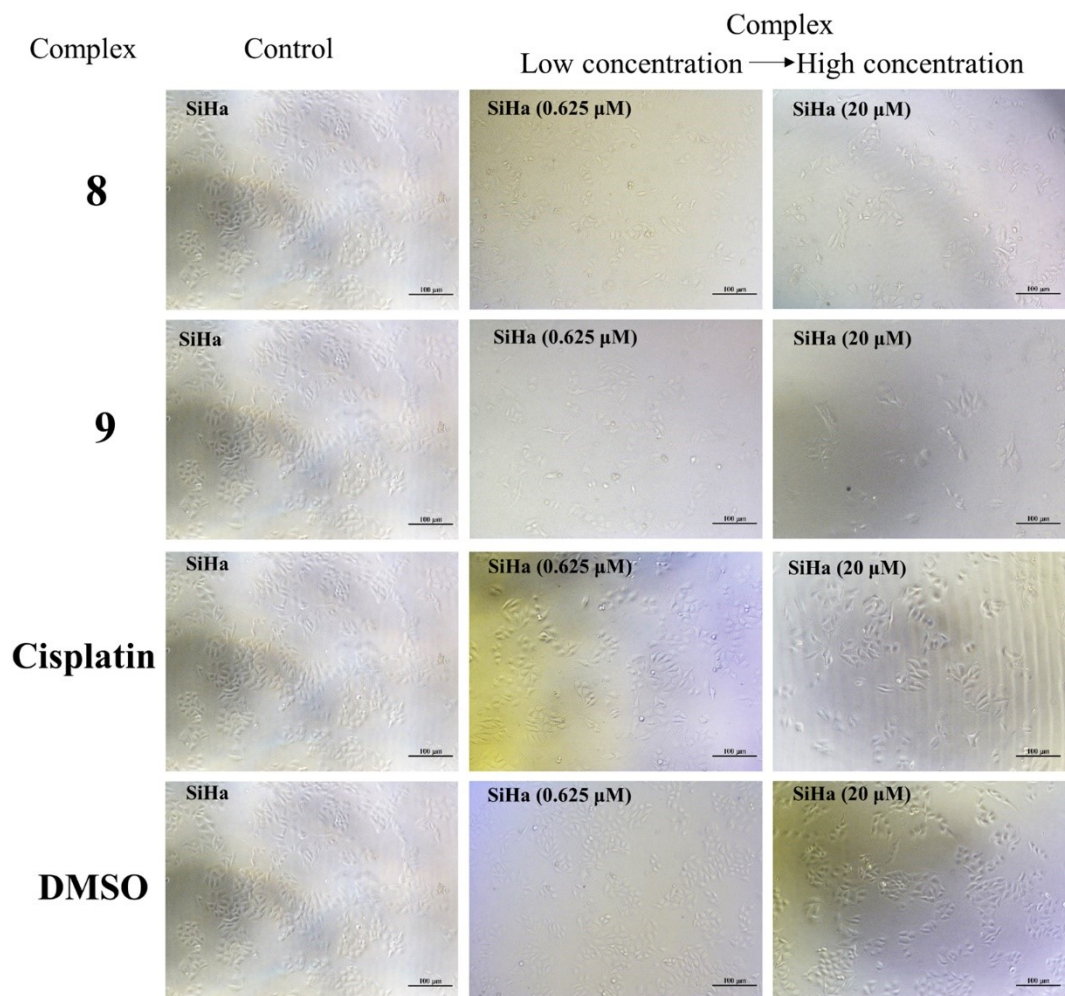

**Figure. S22** The microscopic images of SiHa cells after treating with complexes **1-9** and cisplatin

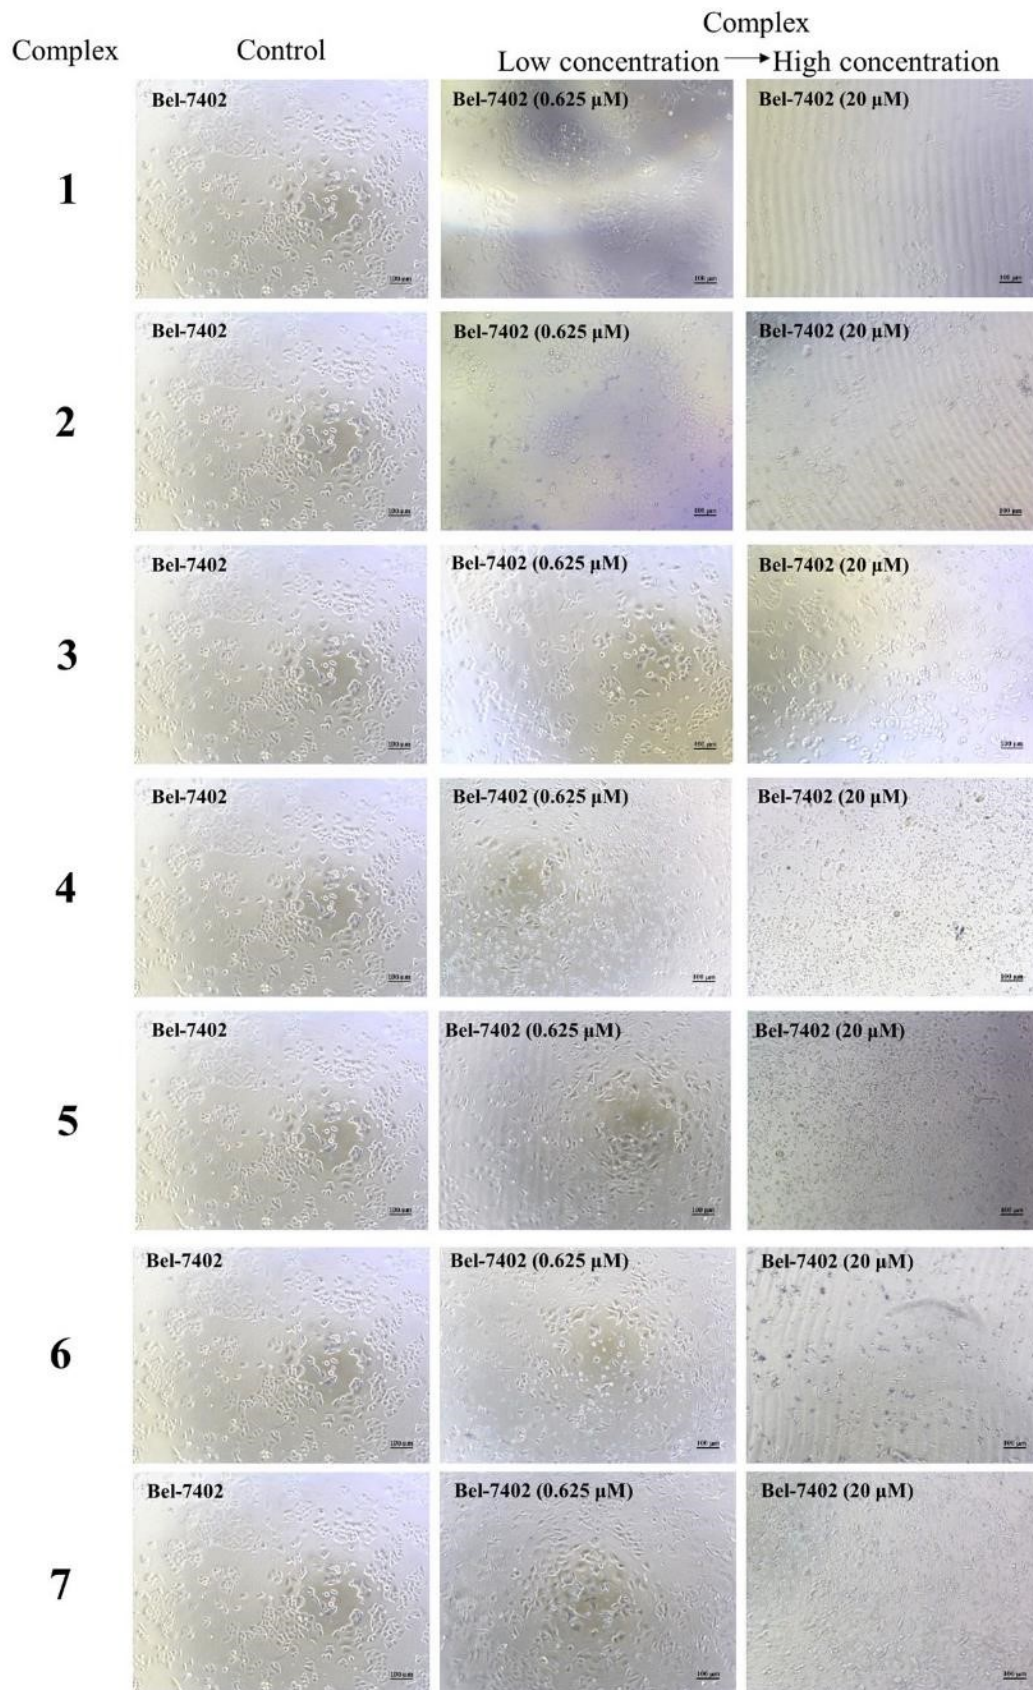

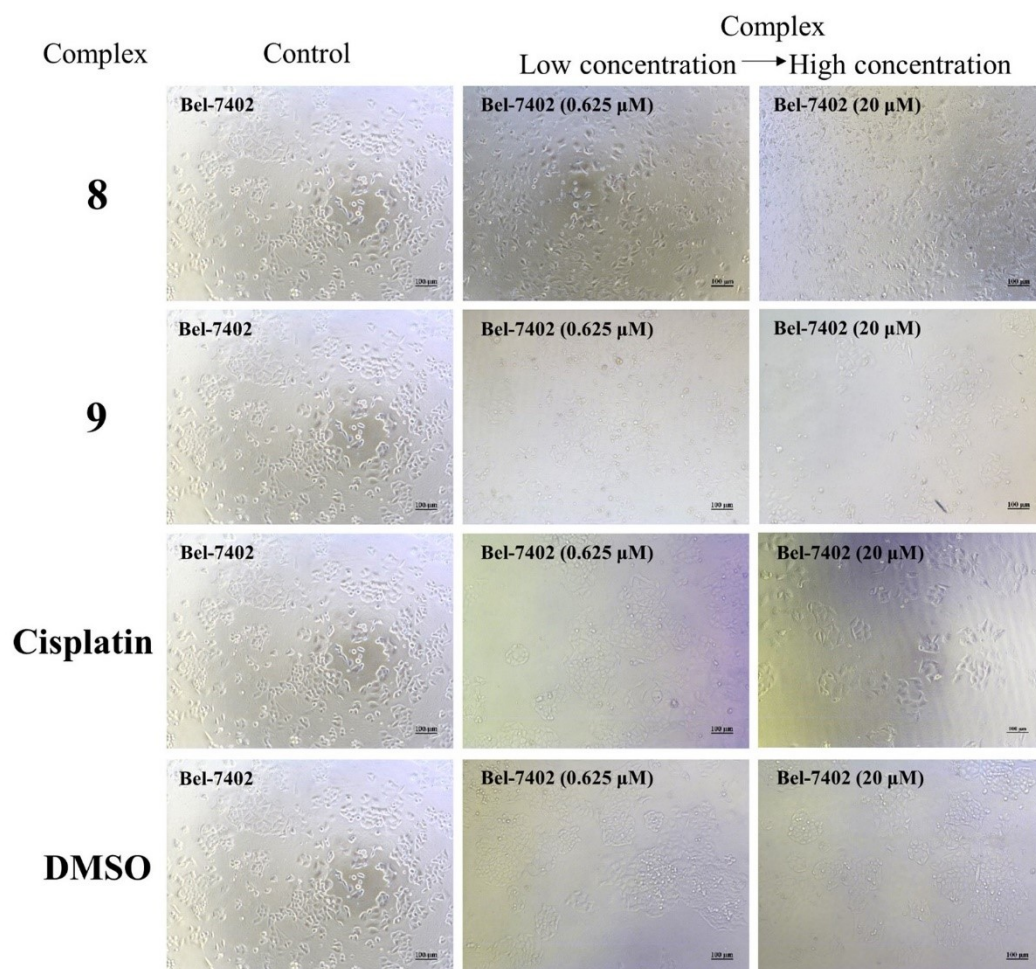

**Figure. S23** The microscopic images of Bel-7402 cells after treating with complexes **1-9** and cisplatin



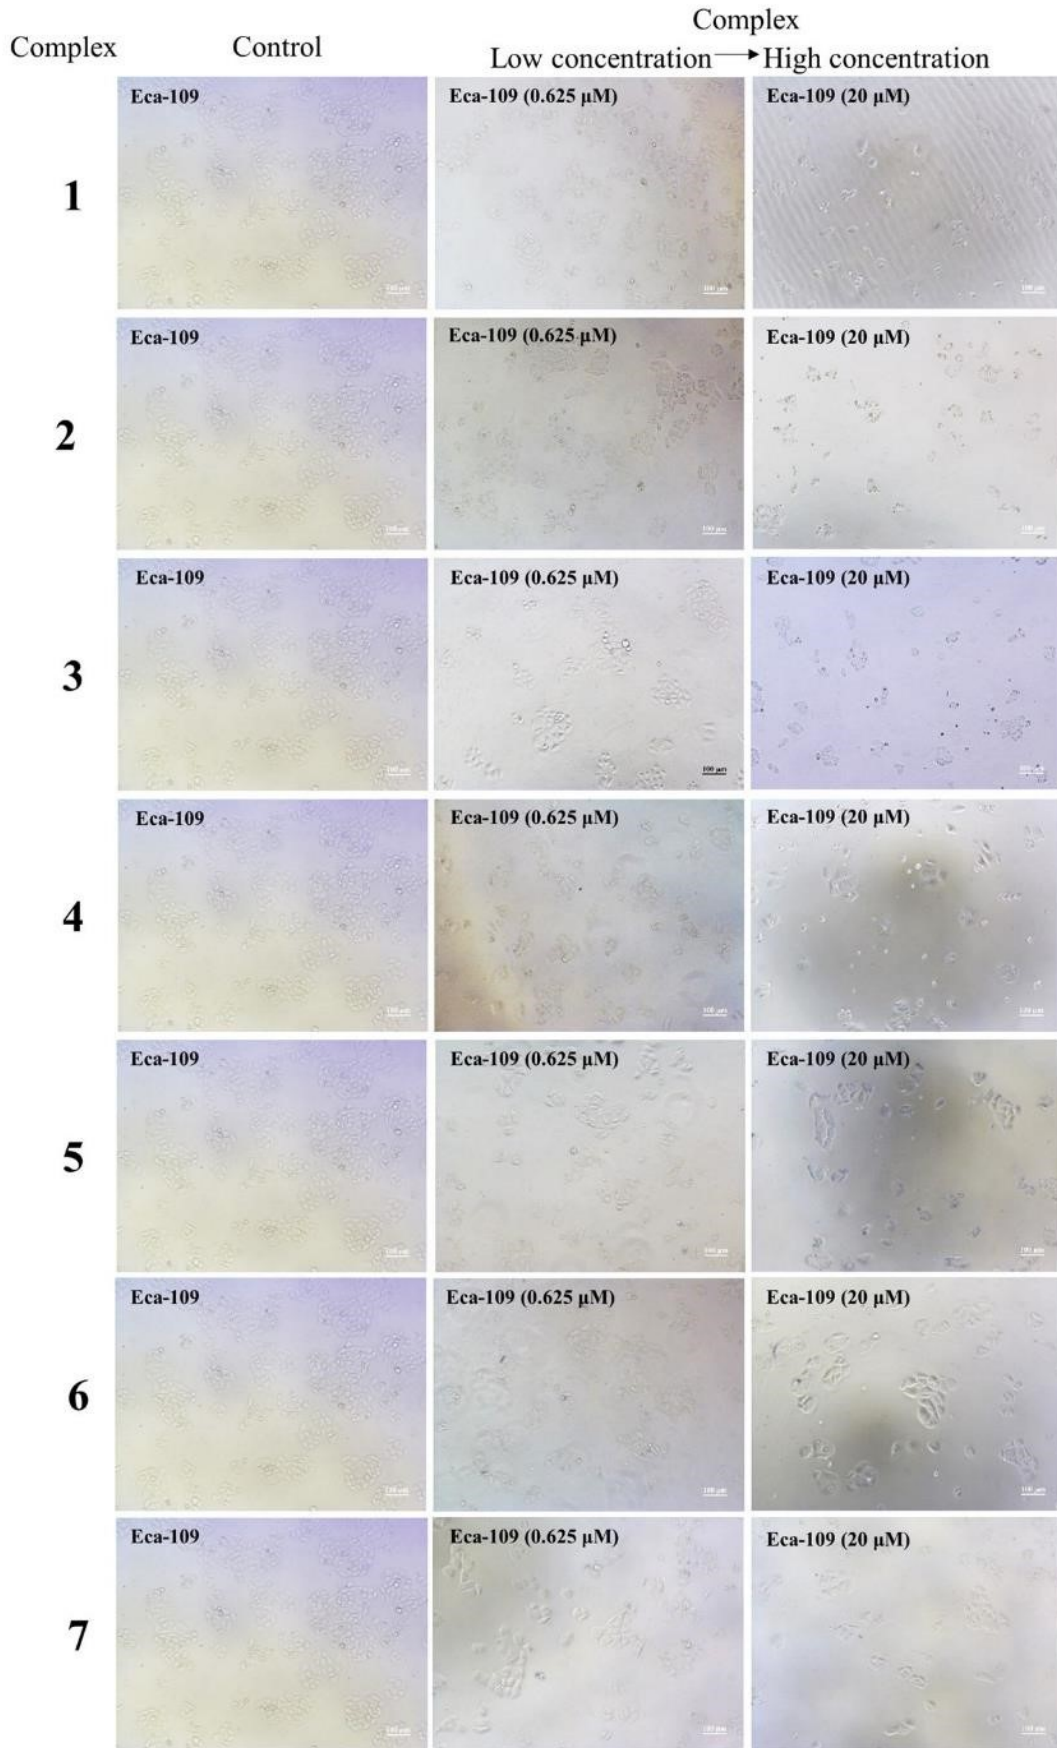

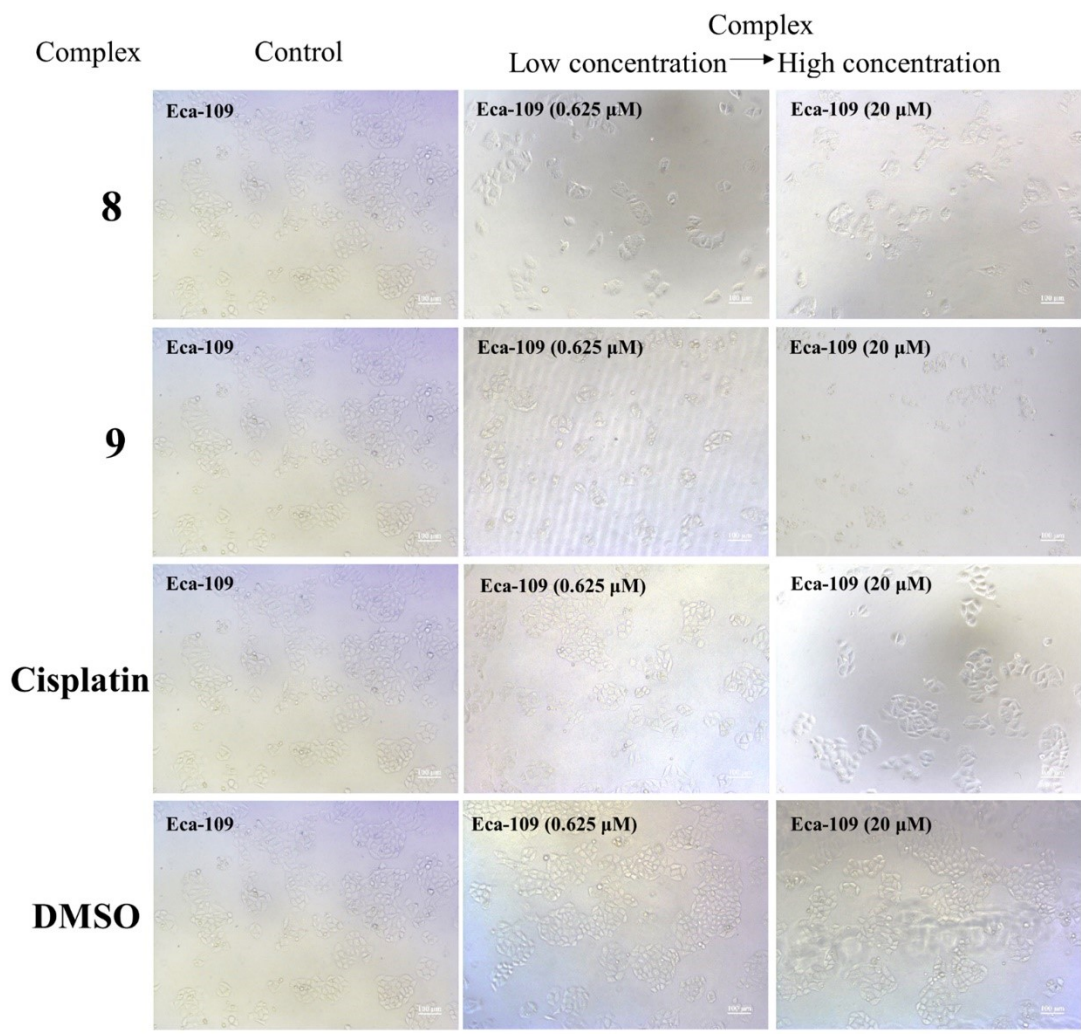

**Figure. S24** The microscopic images of Eca-109 cells after treating with complexes **1-9** and cisplatin

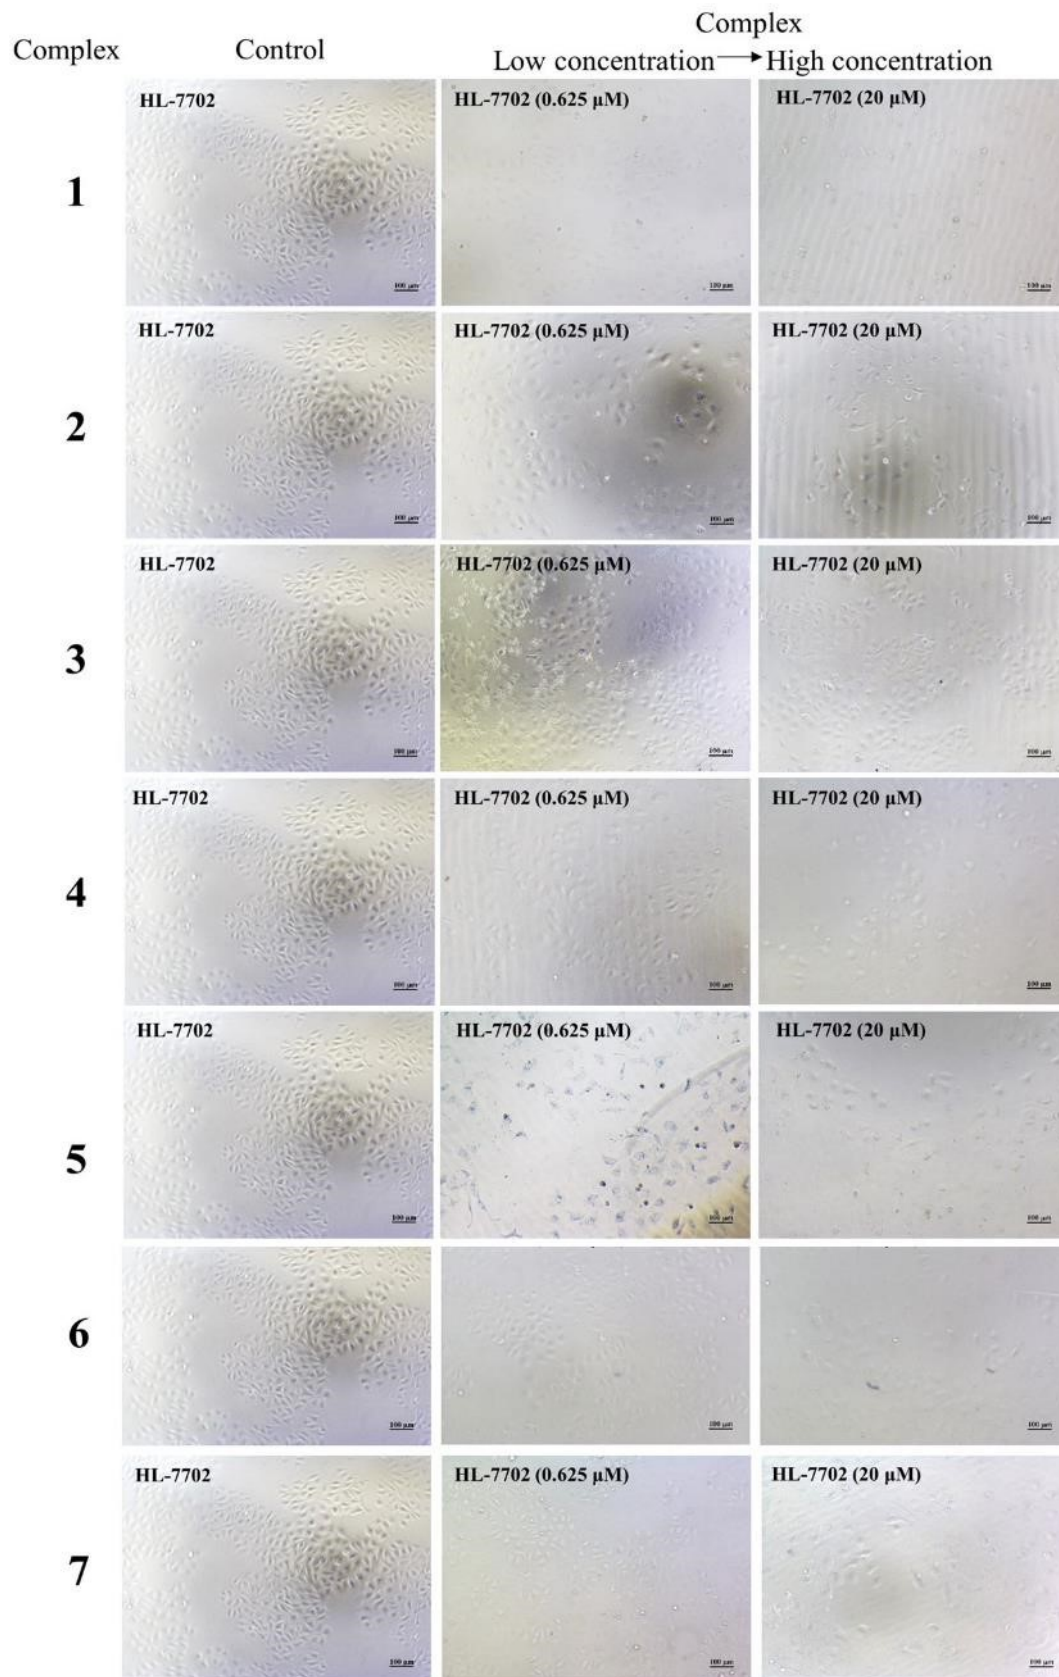

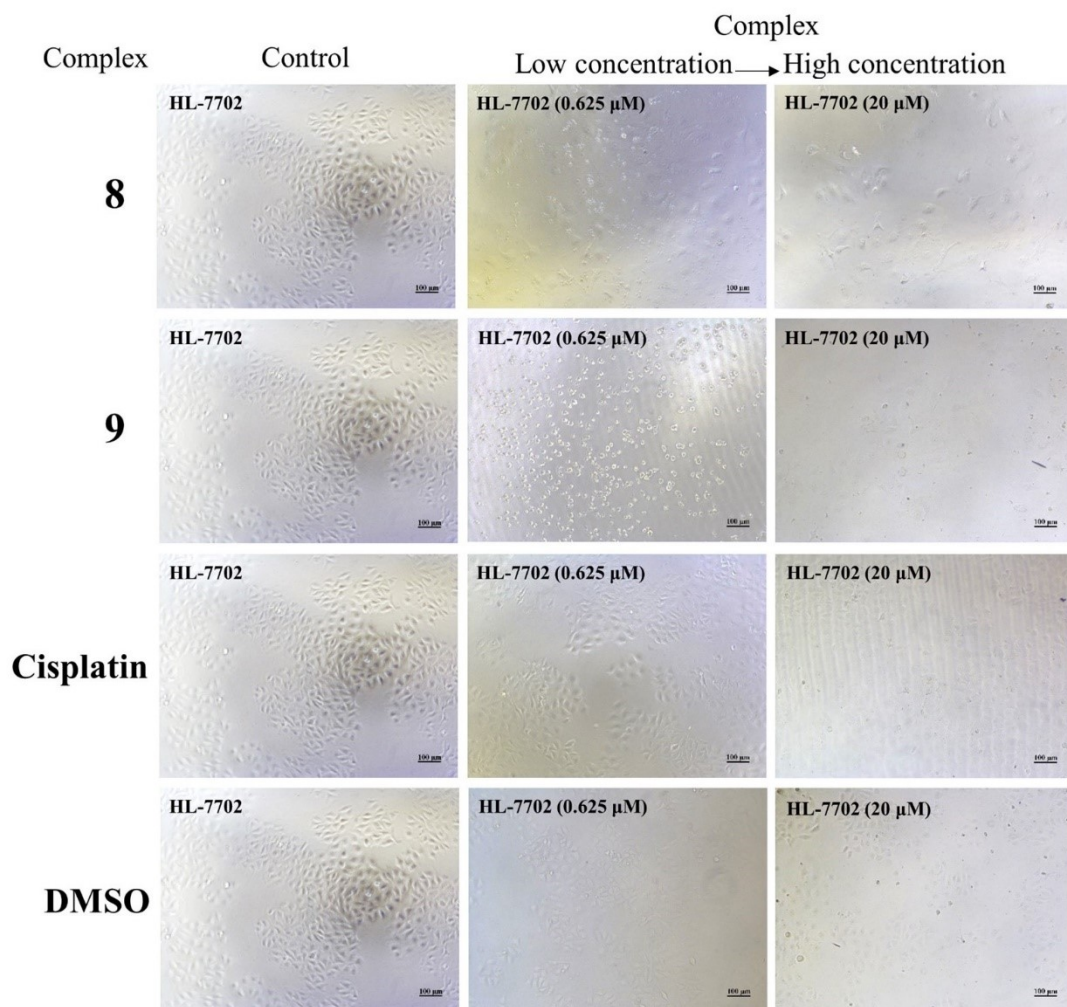

**Figure. S25** The microscopic images of HL-7702 cells after treating with complexes **1-9** and cisplatin

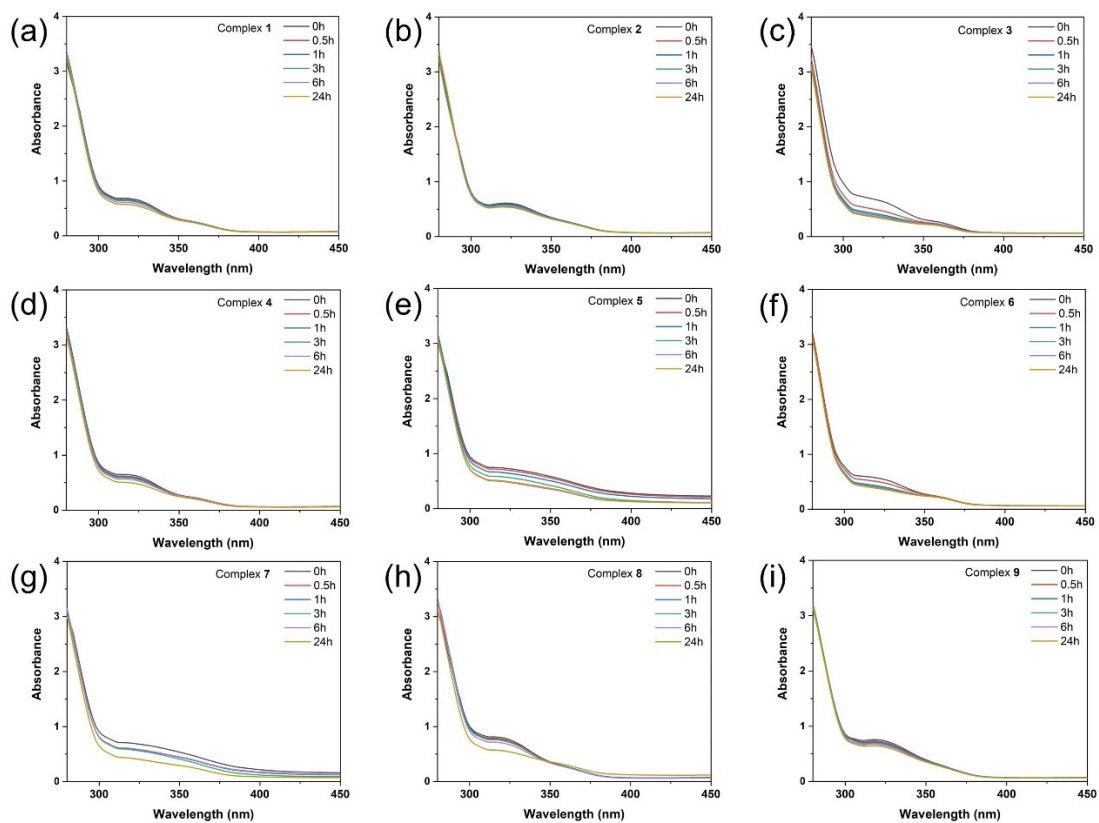

**Figure. S26** UV spectra of complexes 1-9 in Tris-HCl buffer (pH 7.2) recorded at different times (within 24 h) at room temperature

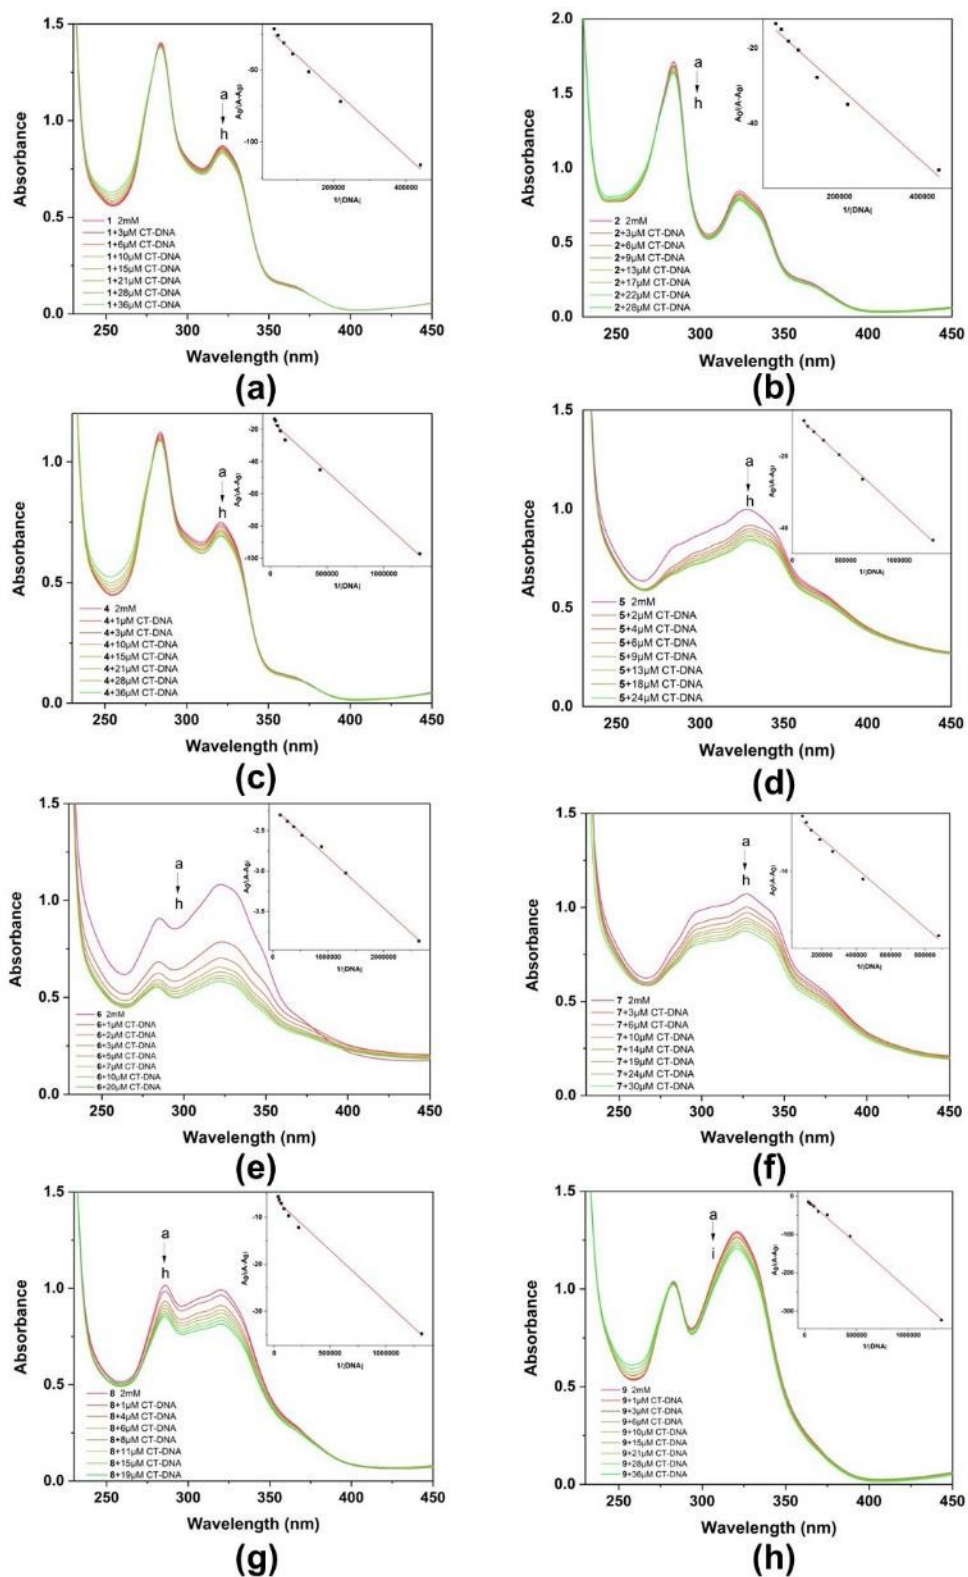

**Figure S27** Absorption spectra of 15  $\mu\text{M}$  of complexes 1-2(a-b) and 4-9(c-h) in a Tris-HCl buffer ( $\text{pH} = 7.2$ ) solution with series concentrations of CT-DNA. The plots of  $A_0/(A-A_0)$  versus the concentration of CT-DNA are shown as the insets

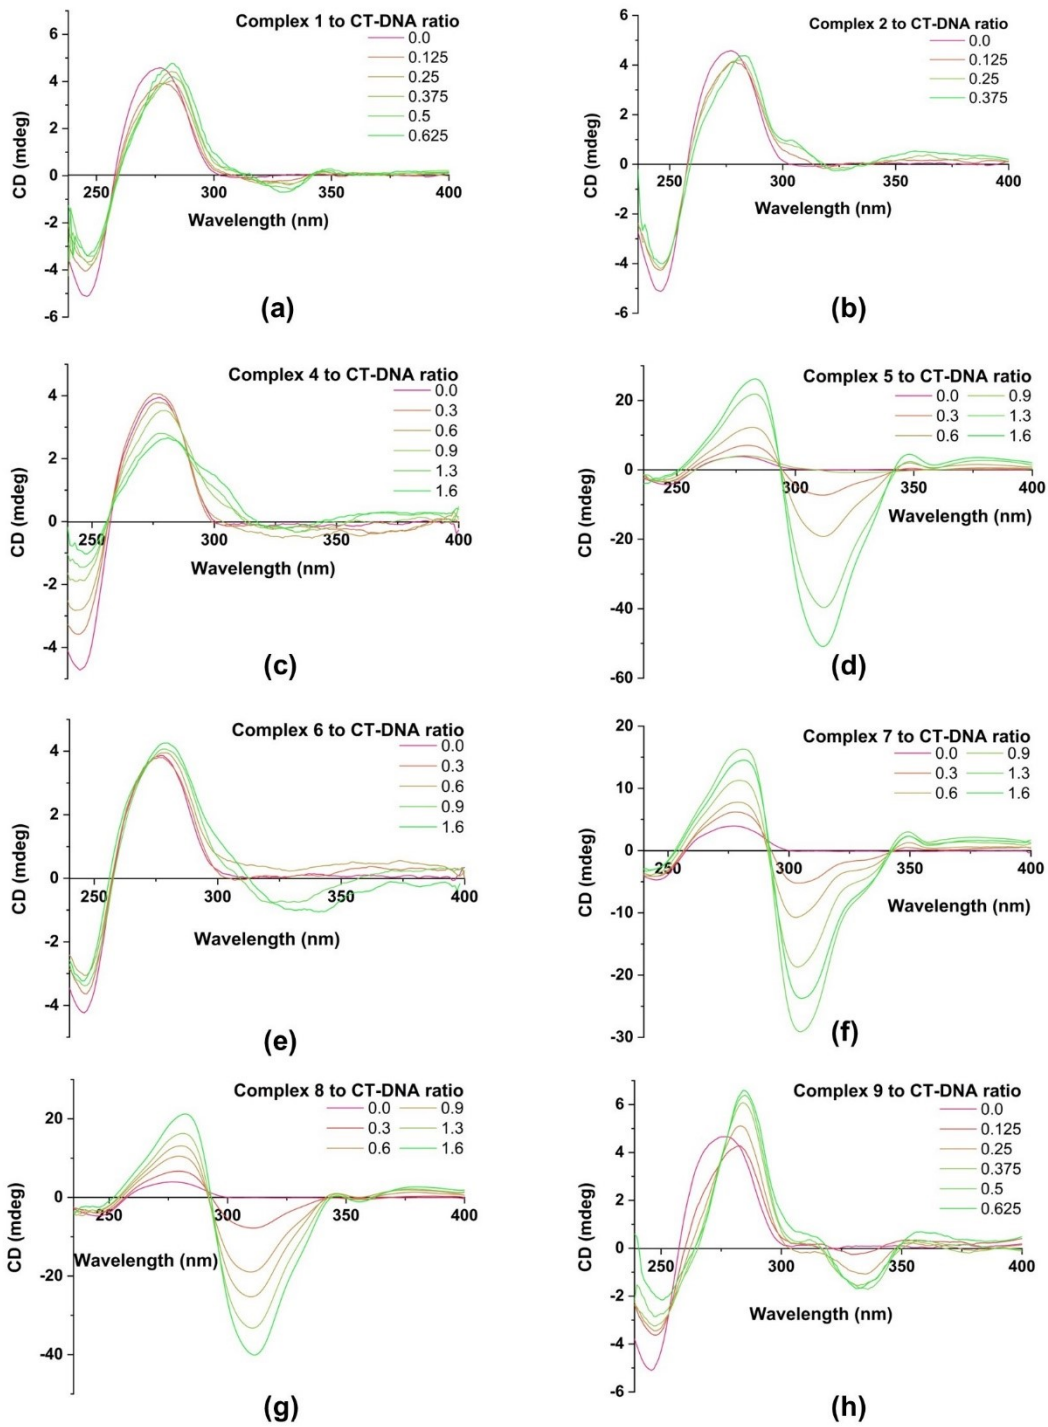

**Figure S28** CD spectra of complexes 1-2(a-b) and 4-9(c-h) to CT-DNA at different concentration ratios

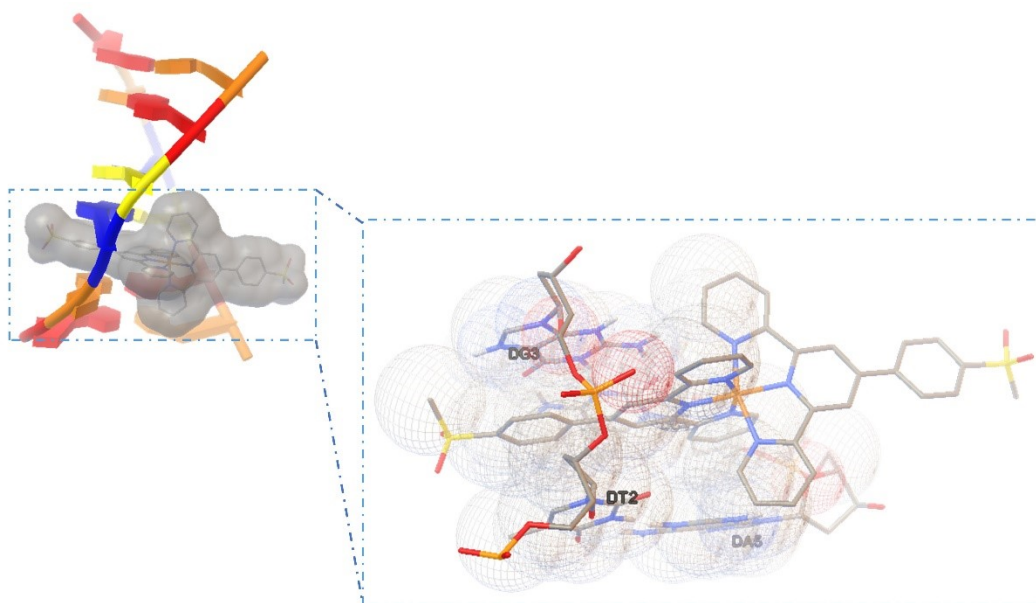

**Figure S29** The most favorable conformation of complex **2** bound with oligonucleotide (4JD8)

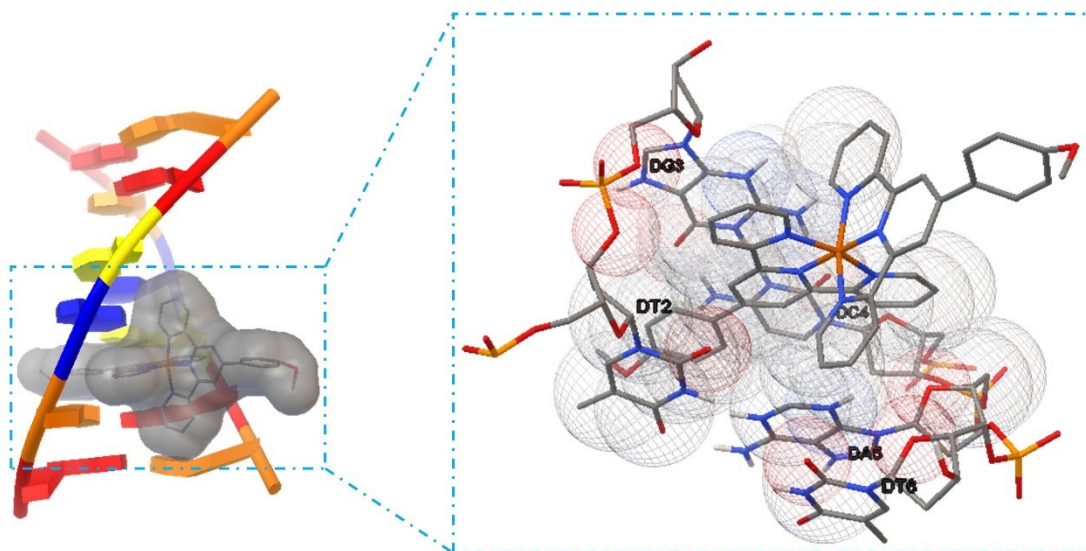

**Figure S30** The most favorable conformation of complex **3** bound with oligonucleotide (4JD8)



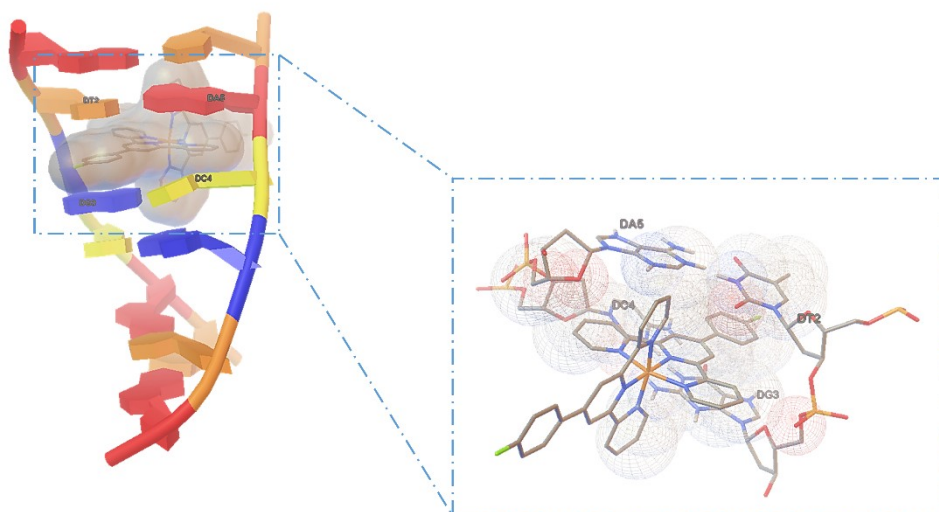

**Figure S31** The most favorable conformation of complex **4** bound with oligonucleotide (4JD8)

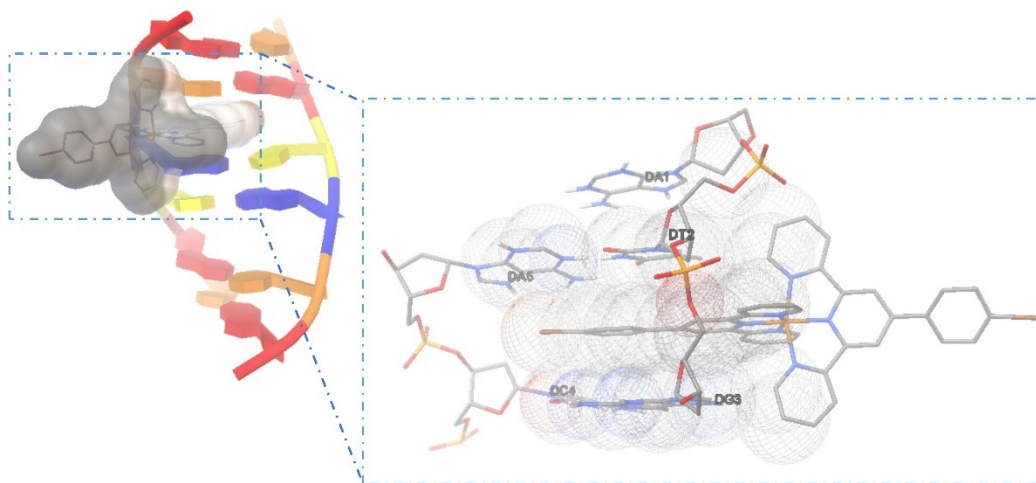

**Figure S32** The most favorable conformation of complex **5** bound with oligonucleotide (4JD8)

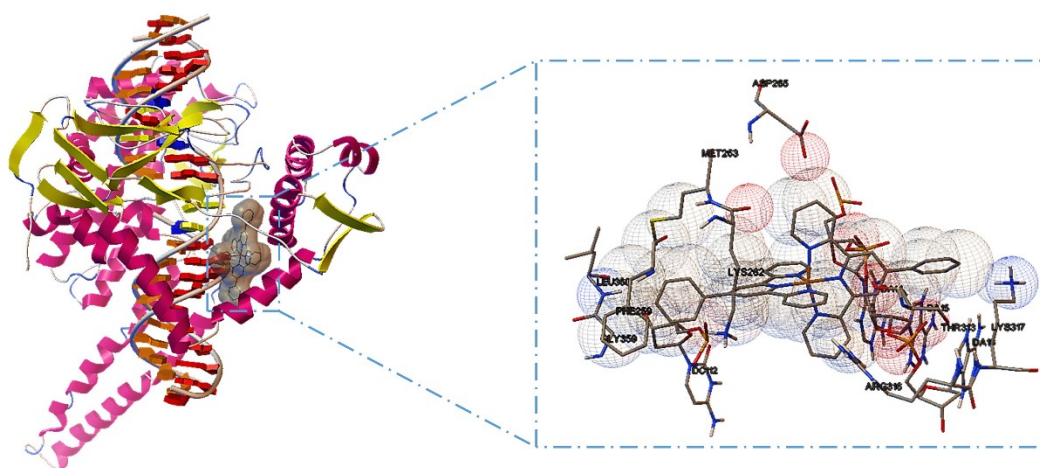

**Figure S33** The most favorable conformation of complex 1 bound with DNA-Topo I (1SC7)

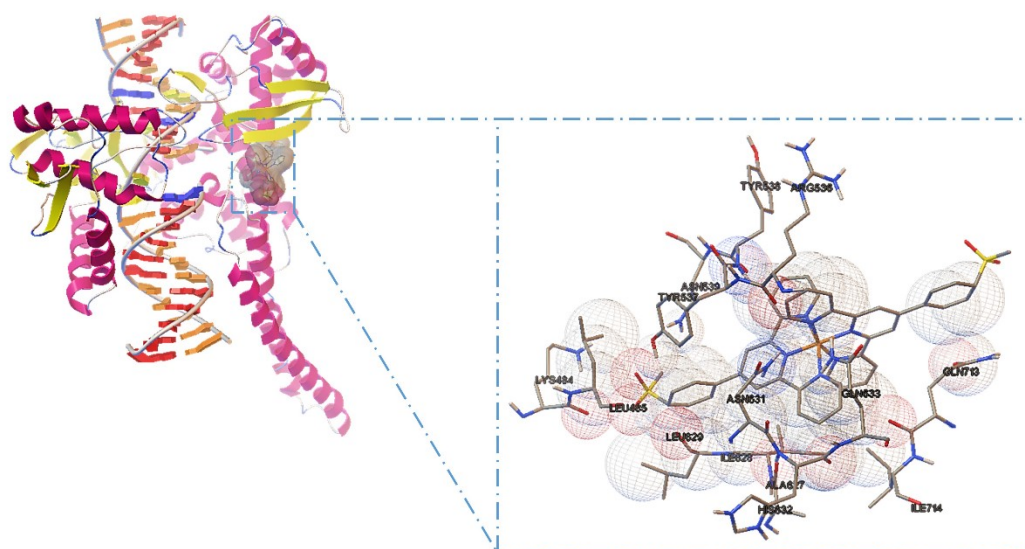

**Figure S34** The most favorable conformation of complex 2 bound with DNA-Topo I (1SC7)

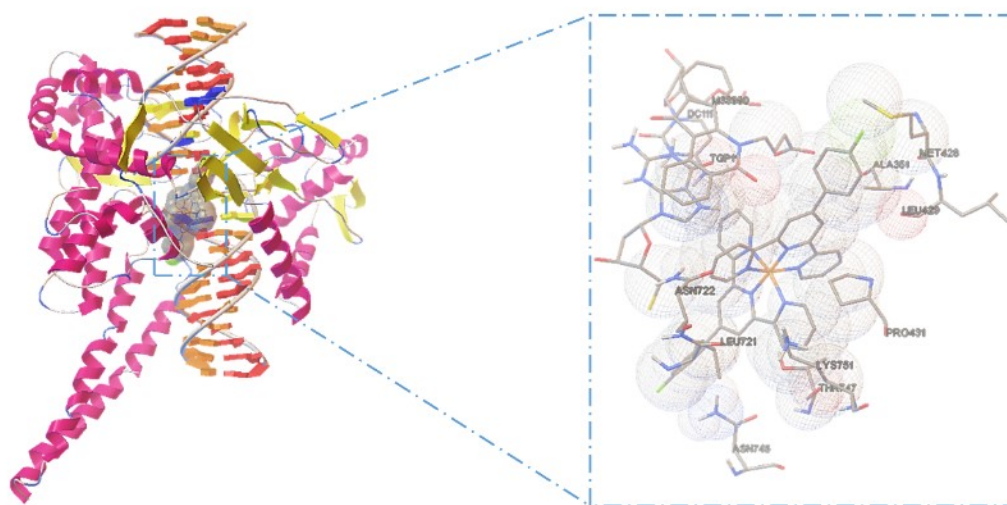

**Figure S35** The most favorable conformation of complex 4 bound with DNA-Topo I (1SC7)

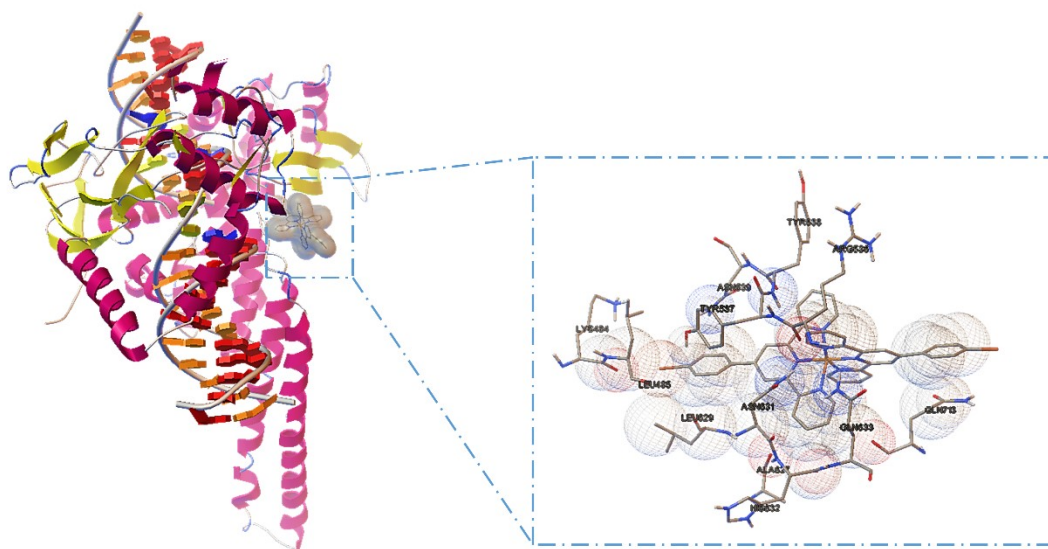

**Figure S36** The most favorable conformation of complex 5 bound with DNA-Topo I (1SC7)

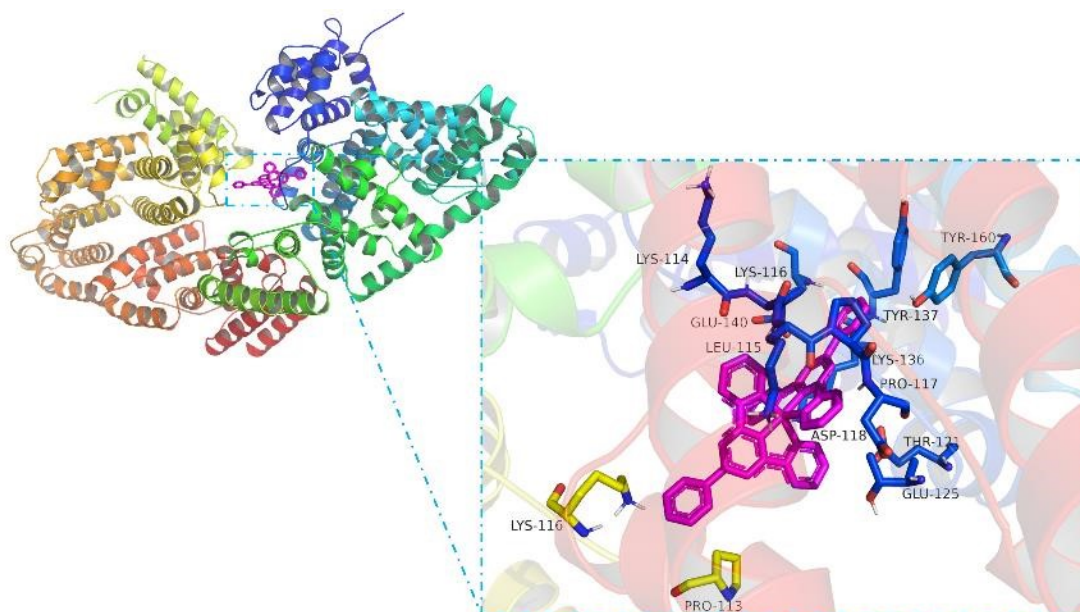

**Figure S37** The most favorable conformation of complex **1** bound with BSA (4F5S)

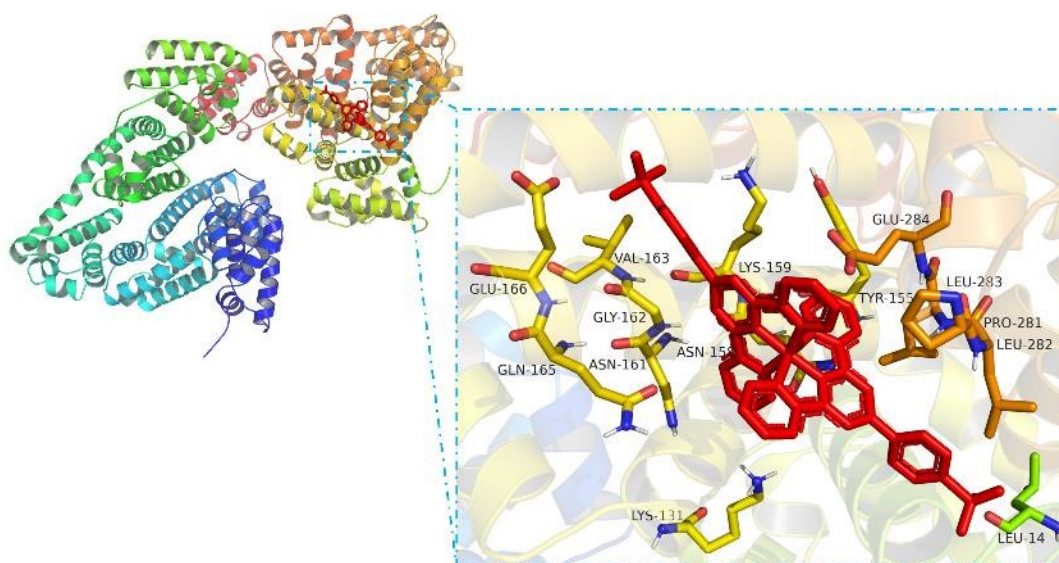

**Figure S38** The most favorable conformation of complex **2** bound with BSA (4F5S)

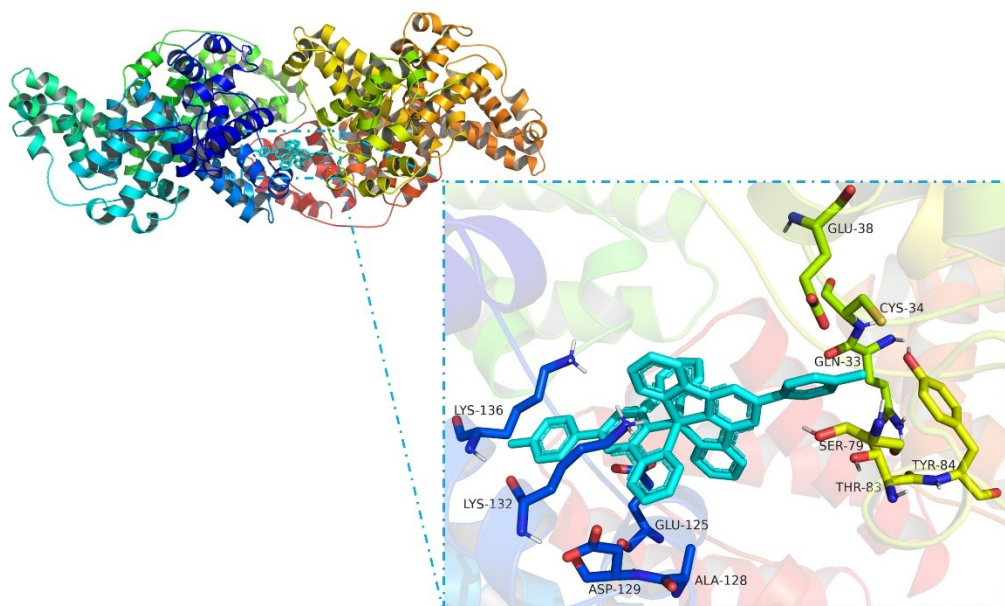

**Figure S39** The most favorable conformation of complex 4 bound with BSA (4F5S)

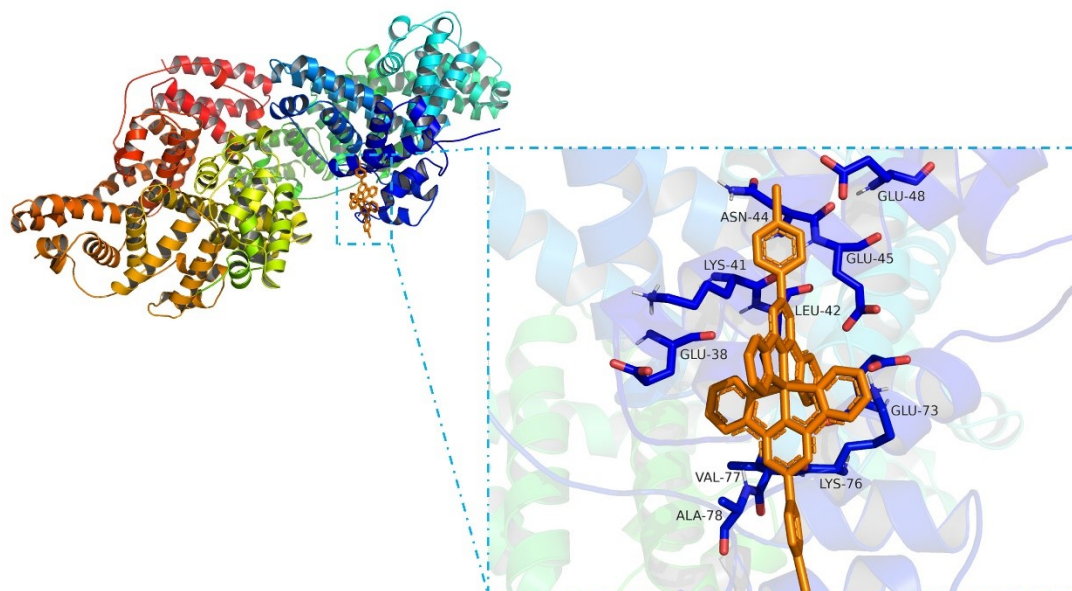

**Figure S40** The most favorable conformation of complex 5 bound with BSA (4F5S)

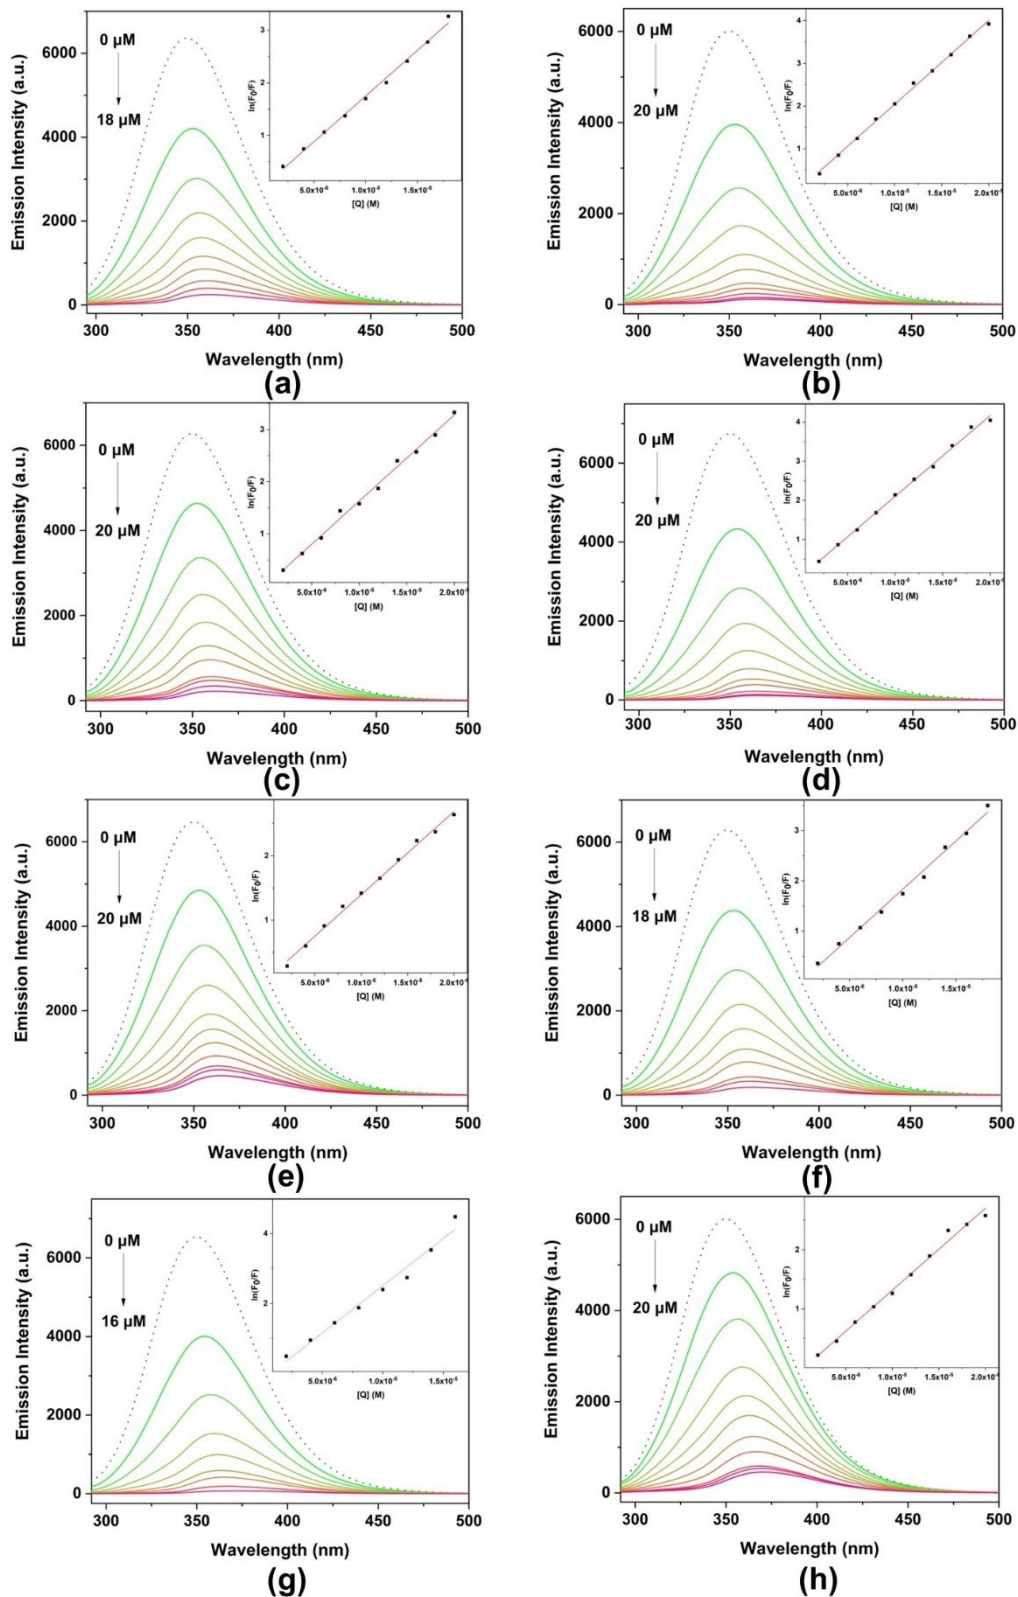

**Figure S41** Fluorescence spectra of 20  $\mu\text{M}$  BSA in the absence (dotted line) and presence (2-20  $\mu\text{M}$ ) of complexes 1-2(a-b) and 4-9(c-h) (solid line)

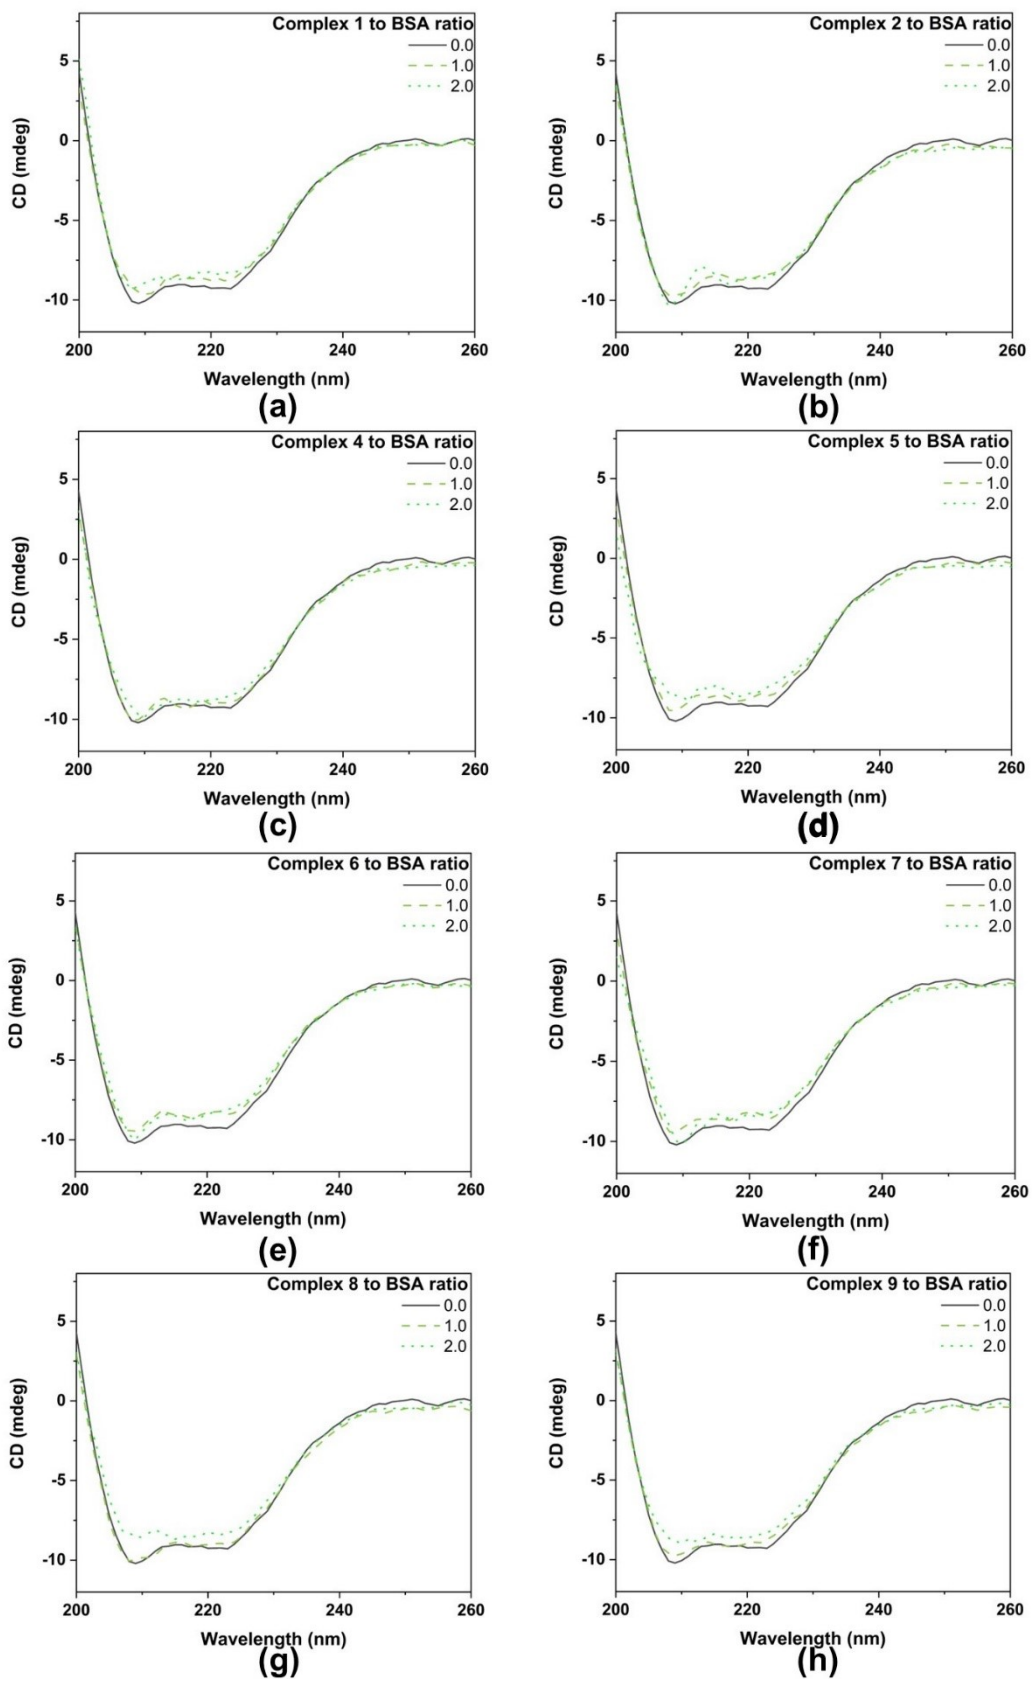

**Figure S42** CD spectra of complexes 1-2(a-b) and 4-9(c-h) to BSA at different concentration ratios

**Table S1** Percentage of element content measured in XPS

| Name  | Atomic % (complex 1) | Atomic % (complex 2) |
|-------|----------------------|----------------------|
| C 1s  | 93.07                | 93.21                |
| Fe 2p | 2.15                 | 2.49                 |
| Br 3d | 4.79                 | 4.29                 |
